# Supplementary material for: Mechanosynthesis and photophysics of colour-tunable photoluminescent group 13 metal complexes with sterically demanding salen and salophen ligands
Source: Royal Society of Chemistry journal article supplement (doi:10.1039/d2fd00117a), 2022-07-29
Supplement: d2fd00117a1.pdf [file d2fd00117a1.pdf]

# Mechanosynthesis and Photophysics of Colour-tunable Photoluminescent Group 13 Metal Complexes with Sterically Demanding Salen and Salophen Ligands

Felix Leon,<sup>†,a</sup> Chenfei Li,<sup>†,a</sup> Javier F. Reynes,<sup>b</sup> Varun K. Singh,<sup>a</sup> Xiao Lian,<sup>c</sup> How Chee Ong,<sup>a</sup> Gavin Hum,<sup>a</sup> Handong Sun,<sup>c</sup> and Felipe García.<sup>b</sup>

<sup>†</sup>Both authors contributed equally

[a] School of Physical and Mathematical Sciences, Division of Chemistry and Biological Chemistry, Nanyang Technological University 21 Nanyang Link, Singapore.

[b] Departamento de Química Orgánica e Inorgánica, Facultad de Química, Universidad de Oviedo, Julián Clavería 8, Oviedo 33006, Asturias, Spain

[c] School of Physical and Mathematical Sciences, Division of Physics and Applied Physics, Nanyang Technological University, 21 Nanyang Link, Singapore.

## Table of Contents

### A. General information

A-1. Compounds synthesis

A-1-1. Synthesis of ligands **1** and **2**

A-1-2. Synthesis of complexes **3a-4b**

### B. Green chemistry metrics (GCM) calculations

*B-1. E-factor calculations*

*B-2. Energy usage calculations*

*B-3. Process mass intensity (PMI) calculations*

*B-4 Generalized reaction mass efficiency (RME)*

### C. NMR, FT-IR and UV-Vis spectra, TOF-MS analysis, spectra photophysical measurements and X-ray structure.

*C-1-1 NMR spectra*

*C-1-2 FT-IR spectra*

*C-1-3 UV-Vis spectra*

*C-1-4 TOF-MS analysis*

*C-1-5. Lifetime and CIE*

*C-1-4. X-Ray structure*

### D. DFT calculations

*D-1-1 Computational details*

*D-1-2. Computed structures*

*D-1-3. Mulliken analysis*

*D-1-4. Atomic coordinates*

### E. Cost Calculations

### F. References

## A. General Information

All samples were prepared in HPLC grade solvent using crystals with varying concentrations on the order of  $\mu\text{M}$ .

Absorption spectra were recorded at room temperature using a Shimadzu UV3600 double beam spectrophotometer. Molar absorptivity was determined by linear fit of values obtained from five independent solutions at varying concentrations ranging from 10.0 to 40.0  $\mu\text{M}$ . The sample solutions for the room temperature emission measurements were prepared in HPLC grade DMSO. Steady-state emission spectra were recorded at room temperature using a Cary Eclipse fluorescence spectrophotometer with excitation at 360 nm.

Excited state lifetimes were measured by time correlated single photon counting (TCSPC) using a pulsed diode laser (exciting at 400 nm) and PL emission was detected at the corresponding steady state emission maximum for each complex at each condition. The PL decays were fitted to a single exponential decay function.

Solution sample  $\Phi_{\text{PL}}$  measurements were performed using an integrating sphere in an Otsuka Electronics quantum efficiency measurement system QE-2000. Samples were excited by an 150W Xenon Lamp coupled to a monochromator, which enabled selectivity of the excitation wavelength, chosen here to be 360 nm. The output was then fed into the  $\phi$  150mm Hemisphere HalfMoon integrating sphere via a fibre, exciting the sample. PL was collected with a multimode fibre and detected with an Electro-cooling CCD Image Sensor.

### A-1. Compounds synthesis

Unless otherwise specified, all chemicals and solvents were purchased commercially, and used without further purification. All the synthesized compounds were characterized by  $^1\text{H}$ ,  $^{13}\text{C}\{^1\text{H}\}$ NMR, UV-VIS and FT-IR. Furthermore, complexes were characterized by mass spectroscopy.  $^1\text{H}$  and  $^{13}\text{C}\{^1\text{H}\}$  NMR spectra were recorded on a Bruker, AVANCE III HD (400 MHz),  $\text{CD}_2\text{Cl}_2$  or  $\text{CDCl}_3$  solution. Chemical shift values were recorded as parts per million relatives to tetramethylsilane as an internal standard, and coupling constants in Hertz. Mass spectra were recorded on an Agilent Q-TOF 6520 system using electrospray ionization in positive ion detection (ESI+) mode. Significant fragments are reported as  $m/z$  (relative intensity). The UV-Vis spectra were recorded on a spectrophotometer Biochrom Libra S50, toluene solution. The FT-IR were recorded on a Perkin Elmer Paragon 1000 spectrometer, KBr pressing rings. For mechanochemical. reactions, Retsch MM400 were used throughout the project.

#### A-1-1. Synthesis of ligands 1 and 2

**Bis(3,5-di-tert-butyl) salen (1):** 1,2-ethylenediamine (0.165 mL g, 2.5 mmol, 1eq.) and 3,5-di-tert-butyl salicylaldehyde (1.01 g, 5 mmol, 2 eq.) were placed in a 15 mL stainless steel jar together with one 10 mm stainless steel ball. The jar was closed and placed in the ball mill and grinded for 2 hours at 30 Hz. The yellow obtained solid was then placed in a  $100^\circ\text{C}$  for 36 hours to drive off the water by-product. The pure product was obtained as a yellow powder (1.14 g, 93% yield).  $^1\text{H}$  NMR (400 MHz,  $\text{CD}_2\text{Cl}_2$ )  $\delta$  13.70 (s, 2H,  $-\text{OH}$ ), 8.44 (s, 2H,  $-\text{CHN}-$ ), 7.43 (d,  $J = 12.1$  Hz, 4H,  $\text{C}_6\text{H}_2(\text{C}(\text{CH}_3)_3)_2$ ), 7.12 (d,  $J = 8.6$  Hz, 2H,  $\text{C}_6\text{H}_2(\text{C}(\text{CH}_3)_3)$ ), 3.95 (s, 4H,  $\text{N}(\text{CH}_2)_2\text{N}$ ), 1.50 (s, 18H,  $\text{C}(\text{CH}_3)_3$ ); 1.34 (s, 18H,  $\text{C}(\text{CH}_3)_3$ ).  $^{13}\text{C}$  NMR (100 MHz,  $\text{CD}_2\text{Cl}_2$ )  $\delta$  167.64, 158.09 140.10, 136.65, 127.06, 126.11, 117.87, 59.64, 35.08, 34.16, 31.54, 29.50. IR (KBr)/ $\text{cm}^{-1}$   $\nu$ : 2956, 2902, 2869, 2365, 1617, 1576, 1483, 1437, 1391, 1362, 1320, 1271, 1251, 1230, 1200, 1172, 1104, 1027, 974, 932, 877, 846, 756, 644.

**Bis(3,5-di-tert-butyl) salophen (2):** 1,2-phenylenediamine (0.27 g, 2.5 mmol, 1eq.) and 3,5-di-tert-butyl salicylaldehyde (1.01 g, 5 mmol, 2eq.) and acetic acid (70  $\mu$ L) were placed in a 15 mL stainless steel jar together with one 10 mm stainless steel ball. The jar was closed and placed in the ball mill and grinded for 2 hours at 30 Hz. The yellow obtained solid was then placed in a 100°C for 36 hours to drive off the water by-product. The pure product was obtained as a yellow powder (1.2 g, 90% yield).  $^1\text{H}$  NMR (400 MHz,  $\text{CD}_2\text{Cl}_2$ )  $\delta$  13.64 (s, 2H, -OH), 8.73 (s, 2H, -CHN-), 7.49 (d,  $J = 2.5$  Hz, 2H), 7.38-7.30 (m, 6H), 1.47 (s, 18H, -C(CH<sub>3</sub>)<sub>3</sub>), 1.36 (s, 18H, -C(CH<sub>3</sub>)<sub>3</sub>).  $^{13}\text{C}$  NMR (100 MHz,  $\text{CD}_2\text{Cl}_2$ )  $\delta$  164.83, 158.43, 142.71, 140.58, 136.98, 128.24, 127.45, 126.98, 119.64, 118.47, 35.06, 34.09, 31.21, 29.23. IR (KBr)/ $\text{cm}^{-1}$   $\nu$ : 2963, 2902, 2869, 2365, 1628, 1595, 1465, 1439, 1393, 1360, 1320, 1294, 1271, 1253, 1235, 1212, 1173, 1132, 1041, 879, 839, 774, 780, 711, 645.

#### A-1-2. Synthesis of complexes **3a-4b**

**General procedure:** An oven-dried stainless-steel grinder jar was charged with **1** or **2** (0.185 mmol), Aluminium or Indium Trichloride (0.277 mmol) and anhydrous  $\text{MgSO}_4$  (300 mg). The jar was then grinded for 6 hours to give a yellow-orange powder. The reaction mixture was then suspended in chloroform, filtered, and the filtrate dried in vacuo to yield the pure product as a yellow powder.

***tBu-Salen-Al (3a):*** Obtained as a white powder (112.8 mg, 88% yield).  $^1\text{H}$  NMR (400 MHz,  $\text{CD}_2\text{Cl}_2$ )  $\delta$  8.43 (s, 2H), 7.60 (s, 2H), 7.13 (s, 2H), 4.12 (s, 2H), 3.80 (s, 2H), 1.54 (s, 18H), 1.33 (s, 18H).  $^{13}\text{C}$  NMR (100 MHz,  $\text{CD}_2\text{Cl}_2$ )  $\delta$  170.85, 162.93, 141.35, 139.55, 131.72, 127.83, 118.72, 55.17, 35.92, 34.36, 31.47, 29.88 IR (KBr)/ $\text{cm}^{-1}$   $\nu$ : 2953, 2914, 2868, 2362, 1649, 1622, 1539, 1472, 1444, 1418, 1392, 1363, 1334, 1307, 1256, 1177, 1202, 1105, 1052, 983, 891, 847, 783, 759, 706, 637, 607, 500, 443. UV-VIS (DMSO)/ $\text{nm}^{-1}$  wavelength: 280, 360 TOF-MS: calc for  $\text{C}_{28}\text{H}_{39}\text{CoN}_3\text{O}_2$  ( $[\text{M} + \text{H}]^+$ ) 517.3375; found 517.3385.

***tBu-Salen-In (3b):*** Obtained as a yellowish powder (95.6 mg, 82% yield).  $^1\text{H}$  NMR (400 MHz,  $\text{CD}_2\text{Cl}_2$ )  $\delta$  8.75 (s, 1H), 8.42 (s, 1H), 7.79 (s, 1H), 7.52 (s, 2H), 7.03 (s, 1H), 4.45 (s, 2H), 4.05 (s, 2H), 3.84 (s, 2H), 1.48 (s, 18 H), 1.,31 (s, 18H).  $^{13}\text{C}$  NMR (100 MHz,  $\text{CD}_2\text{Cl}_2$ )  $\delta$  173.26, 172.13, 167.94, 142.75, 138.44, 130.98, 129.66, 118.10, 35.94, 34.30, 31.46, 31.21, 30.23, 29.67 IR (KBr)/ $\text{cm}^{-1}$   $\nu$ : 2961, 2906, 2869, 2345, 1653, 1623, 1534, 1477, 1465, 1440, 1412, 1392, 1363, 1334, 1261, 1201, 1170, 1100, 1026, 923, 910, 802, 745, 701, 640, 533. UV-VIS (DMSO)/ $\text{nm}^{-1}$  wavelength: 331 TOF-MS: calc for  $\text{C}_{28}\text{H}_{39}\text{CoN}_3\text{O}_2$  ( $[\text{M} + \text{H}]^+$ ) 605.2598; found 605.2593.

***tBu-Salophen-Al (4a):*** Obtained as a yellow powder. (96.2 mg, 80% yield).  $^1\text{H}$  NMR (400 MHz,  $\text{CD}_2\text{Cl}_2$ )  $\delta$  9.03 (s, 2H), 7.82 – 7.72 (m, 4H), 7.49 (s, 2H), 7.33 (m, 2H), 1.60 (s, 18 H), 1.38 (s, 18 H).  $^{13}\text{C}$  NMR (100 MHz,  $\text{CD}_2\text{Cl}_2$ )  $\delta$  164.40, 163.10, 141.72, 140.33, 138.09, 133.49, 128.85, 118.89, 115.90, 36.02, 34.48, 31.40, 30.01 IR (KBr)/ $\text{cm}^{-1}$   $\nu$ : 2957, 2904, 2868, 1615, 1585, 1538, 1471, 1413, 1389, 1359, 1317, 1261, 1201, 1185, 1135, 1028, 872, 847, 817, 786, 745, 599, 568, 507, 446 UV-VIS (DMSO)/ $\text{nm}^{-1}$  wavelength: 314, 330, 343, 409, 448 TOF-MS: calc for  $\text{C}_{28}\text{H}_{39}\text{CoN}_3\text{O}_2$  ( $[\text{M} + \text{H}]^+$ ) 565.3375; found 565.3370.

***tBu-Salophen-In (4b):*** Obtained as a yellow powder. (96.5 mg, 70% yield).  $^1\text{H}$  NMR (400 MHz,  $\text{CD}_2\text{Cl}_2$ )  $\delta$  8.85 (s, 2H), 7.75-7.62 (m, 4H), 7.48 (s, 2H), 7.18 (s, 2H), 1.51 (s, 18 H), 1.34 (s, 18 H).  $^{13}\text{C}$  NMR (100 MHz,  $\text{CD}_2\text{Cl}_2$ )  $\delta$  169.51, 166.01, 143.10, 139.18, 137.25, 132.75, 130.54, 128.97, 116.79, 36.01, 34.41, 31.37, 29.71 IR (KBr)/ $\text{cm}^{-1}$   $\nu$ : 2960, 2905, 2869, 1608, 1580, 1530, 1482, 1463, 1430, 1388, 1361, 1316, 1261, 1193, 1174, 1096, 1024, 871, 835, 803, 750, 668, 638, 533, 491, 443 UV-VIS (DMSO)/ $\text{nm}^{-1}$  wavelength: 303, 338, 407 TOF-MS: calc for  $\text{C}_{28}\text{H}_{39}\text{CoN}_3\text{O}_2$  ( $[\text{M} + \text{H}]^+$ ) 653.2598; found 653.2599.

## B. Green chemistry metrics (GCM) calculations

All conventional solution information have been obtained by [1]

### B-1. E-factor calculations\*

\*All quantities are expressed in grams. LAG was done by adding 1  $\frac{\mu\text{L}}{\text{mmol}}$  of methanol

Mechanosynthesis of t-Bu-Salen (**1**):

**Formula used:**

$$E = \frac{\text{Benzaldehyde} + 1,2\text{-ethylenediamine} + \text{methanol} - \text{total product}}{\text{total product}}$$

$$E = \frac{1.01 + 0.150 + 0.24 - 1.14}{1.14}$$

$$\mathbf{E = 0.4}$$

Mechanosynthesis of t-Bu-Salophen (**2**):

**Formula used:**

$$E = \frac{\text{Benzaldehyde} + 1,2\text{-phenylenediamine} + \text{acetic acid} + \text{methanol} - \text{total product}}{\text{total product}}$$

$$E = \frac{1.01 + 0.27 + 0.0735 + 0.24 - 1.213}{1.213}$$

$$\mathbf{E = 0.314}$$

Mechanosynthesis of t-Bu-Salen (Al)Cl (**3a**):

**Formula used:**

$$E = \frac{\text{Benzaldehyde} + 1,2\text{-ethylenediamine} + \text{AlCl}_3 + \text{methanol} + \text{MgSO}_4 - \text{total product}}{\text{total product}}$$

$$E = \frac{0.06 + 0.03 + 0.037 + 0.027 + 0.3 - 0.113}{0.113}$$

$$\mathbf{E = 3.02}$$

Mechanosynthesis of t-Bu-Salen (In)Cl (**3b**):

**Formula used:**

$$E = \frac{\text{Benzaldehyde} + 1,2\text{-ethylenediamine} + \text{InCl}_3 + \text{methanol} + \text{MgSO}_4 - \text{total product}}{\text{total product}}$$

$$E = \frac{0.06 + 0.03 + 0.061 + 0.027 + 0.3 - 0.097}{0.097}$$

$$E = 3.93$$

Mechanosynthesis of t-Bu-Salophen (Al)Cl (**4a**):

*Formula used:*

$$E = \frac{\text{Benzaldehyde} + 1,2\text{-phenylenediamine} + \text{AlCl}_3 + \text{methanol} + \text{MgSO}_4 - \text{total product}}{\text{total product}}$$

$$E = \frac{0.066 + 0.034 + 0.037 + 0.027 + 0.3 - 0.096}{0.096}$$

$$E = 3.83$$

Mechanosynthesis of t-Bu-Salophen (In)Cl (**4b**):

*Formula used:*

$$E = \frac{\text{Benzaldehyde} + 1,2\text{-phenylenediamine} + \text{InCl}_3 + \text{methanol} + \text{MgSO}_4 - \text{total product}}{\text{total product}}$$

$$E = \frac{0.066 + 0.034 + 0.061 + 0.027 + 0.3 - 0.097}{0.097}$$

$$E = 4.03$$

Conventional solution synthesis of Conventional solution synthesis of t-Bu-Salen (**1**):

*Formula used:*

$$E = \frac{\text{Benzaldehyde} + 1,2\text{-ethylenediamine} + \text{ethanol (10\%)} + \text{Toluene (10\%)} - \text{total product}}{\text{total product}}$$

$$E = \frac{1.01 + 0.150 + 1.184 + 0.701 - 0.96}{0.96}$$

$$E = 2.045$$

Conventional solution synthesis of t-Bu-Salophen (**2**)

*Formula used:*

$$E = \frac{\text{Benzaldehyde} + 1,2\text{-phenylenediamine} + \text{ethanol (10\%)} + \text{Toluene (10\%)} - \text{total product}}{\text{total product}}$$

$$E = \frac{1.01 + 0.27 + 1.184 + 0.701 - 0.96}{0.96}$$

$$E = 2.29$$

Conventional solution synthesis of t-Bu-Salen (Al)Cl (**3a**):

*Formula used:*

$$E = \frac{\text{Benzaldehyde} + 1,2\text{-ethylenediamine} + \text{AlCl}_3 + \text{ethanol (10\%)} + \text{Toluene (10\%)} - \text{total product}}{\text{total product}}$$

$$E = \frac{0.06 + 0.03 + 0.027 + 0.158 + 0.088 - 0.063}{0.063}$$

$$E = 4.76$$

Conventional solution synthesis of t-Bu-Salen (In)Cl (**3b**):

**Formula used:**

$$E = \frac{\text{Benzaldehyde} + 1,2\text{-ethylenediamine} + \text{InCl}_3 + \text{ethanol (10\%)} + \text{Toluene (10\%)} - \text{total product}}{\text{total product}}$$

$$E = \frac{0.06 + 0.03 + 0.044 + 0.158 + 0.088 - 0.063}{0.063}$$

$$\mathbf{E = 5.03}$$

Conventional solution synthesis of t-Bu-Salophen (Al)Cl (**4a**):

**Formula used:**

$$E = \frac{\text{Benzaldehyde} + 1,2\text{-phenylenediamine} + \text{AlCl}_3 + \text{ethanol (10\%)} + \text{Toluene (10\%)} - \text{total product}}{\text{total product}}$$

$$E = \frac{0.066 + 0.034 + 0.027 + 0.158 + 0.088 - 0.063}{0.063}$$

$$\mathbf{E = 4.92}$$

Conventional solution synthesis of t-Bu-Salophen (In)Cl (**4b**):

**Formula used:**

$$E = \frac{\text{Benzaldehyde} + 1,2\text{-phenylenediamine} + \text{InCl}_3 + \text{ethanol (10\%)} + \text{Toluene (10\%)} - \text{total product}}{\text{total product}}$$

$$E = \frac{0.066 + 0.034 + 0.044 + 0.158 + 0.088 - 0.063}{0.063}$$

$$\mathbf{E = 5.19}$$

## B-2. Energy usage calculations

Energy consumption and energy saved at each step (Ligand + Complex) of the mechanochemistry and conventional solution-based synthesis processes were calculated based on the following equation (1 kW = 3.6 MJ):

*Energy consumption by unit operation/process (kWh) = Power rating of the instrument (kW) X Time of operation (h)*

$$\% \text{ Energy saved} = \frac{\text{Energy used (Solution method) - Mechanochemistry}}{\text{Energy used in Solution method}} \times 100$$

Power consumption of:

- Vibratory shaker mill (Retsch, MM400) = 150 W (2 station)
- Hot plate stirrer (Hei-standard), = 800 W

Larger scale projections were made using a conversion factor based on previously published data<sup>1</sup>.

0.1 g;

Energy used for 0.1 g scale reaction:

Mechanochemistry of t-Bu-Salen (Al)Cl (**3a**), t-Bu-Salen (In)Cl (**3b**), t-Bu-Salophen (Al)Cl (**4a**), t-Bu-salophen (In)Cl (**4b**):

Energy used = (0.15 kW x 2 h) + (0.15 kW x 6 h) = 1.2 kWh/0.0001 kg = 12000 kWh/kg = 43200 MJ/kg (each complex)

Solution synthesis of t-Bu-Salen (Al)Cl (**3a**), t-Bu-Salen (In)Cl (**3b**), t-Bu-Salophen (Al)Cl (**4a**), t-Bu-salophen (In)Cl (**4b**):

Energy used = (0.8 kW x 12 h) + (0.8 kW x 12 h) = 19.2 kWh/0.0001 kg = 192000 kWh/kg = 691200 MJ/kg (each complex)

1.0 g;

Energy used for 1.0 g scale reaction:

Mechanochemistry of t-Bu-Salen (Al)Cl (**3a**), t-Bu-Salen (In)Cl (**3b**), t-Bu-Salophen (Al)Cl (**4a**), t-Bu-salophen (In)Cl (**4b**):

Energy used = (0.15 kW x 2 h) + (0.15 kW x 6 h) = 1.2 kWh/0.001 kg = 1200 kWh/kg = 4320 MJ/kg (each complex)

Solution synthesis of t-Bu-Salen (Al)Cl (**3a**), t-Bu-Salen (In)Cl (**3b**), t-Bu-Salophen (Al)Cl (**4a**), t-Bu-salophen (In)Cl (**4b**):

Energy used = (0.8 kW x 12 h) + (0.8 kW x 12 h) = 19.2 kwh/0.001 kg = 19200 kwh/ kg = 69120 MJ/kg (each complex)

30 g;

Energy used 30 g scale reaction:

Mechanosynthesis of t-Bu-Salen (Al)Cl (**3a**), t-Bu-Salen (In)Cl (**3b**), t-Bu-Salophen (Al)Cl (**4a**), t-Bu-salophen (In)Cl (**4b**):

Energy used = (1.25 kW x 2 h) + (1.25 kW x 6 h) = 10 kwh/0.03 kg = 333.3 kwh/ kg = 1200 MJ/kg (each complex)

Solution synthesis of t-Bu-Salen (Al)Cl (**3a**), t-Bu-Salen (In)Cl (**3b**), t-Bu-Salophen (Al)Cl (**4a**), t-Bu-salophen (In)Cl (**4b**):

Energy used = (0.8 kW x 12 h) + (0.8 kW x 12 h) = 19.2 kwh/0.03 kg = 640 kwh/ kg = 2304 MJ/kg (each complex)

60 g;

Energy used 60 g scale reaction:

Mechanosynthesis of t-Bu-Salen (Al)Cl (**3a**), t-Bu-Salen (In)Cl (**3b**), t-Bu-Salophen (Al)Cl (**4a**), t-Bu-salophen (In)Cl (**4b**):

Energy used = (1.25 kW x 2 h) + (1.25 kW x 6 h) = 10 kwh/0.06 kg = 166.7 kwh/ kg = 600 MJ/kg (each complex)

Solution synthesis of t-Bu-Salen (Al)Cl (**3a**), t-Bu-Salen (In)Cl (**3b**), t-Bu-Salophen (Al)Cl (**4a**), t-Bu-salophen (In)Cl (**4b**):

Energy used = (0.8 kW x 12 h) + (0.8 kW x 12 h) = 19.2 kwh/0.06 kg = 320 kwh/ kg = 1152 MJ/kg (each complex)

120 g;

Energy used 120 g scale reaction:

Mechanosynthesis of t-Bu-Salen (Al)Cl (**3a**), t-Bu-Salen (In)Cl (**3b**), t-Bu-Salophen (Al)Cl (**4a**), t-Bu-salophen (In)Cl (**4b**):

Energy used = (1.6 kW x 2 h) + (1.6 kW x 6 h) = 12.8 kwh/0.120 kg = 106.7 kwh/ kg = 384 MJ/kg (each complex)

Solution synthesis of t-Bu-Salen (Al)Cl (**3a**), t-Bu-Salen (In)Cl (**3b**), t-Bu-Salophen (Al)Cl (**4a**), t-Bu-salophen (In)Cl (**4b**):

Energy used = (0.8 kW x 12 h) + (0.8 kW x 12 h) = 19.2 kwh/0.120 kg = 160 kwh/ kg = 512 MJ/kg (each complex)



In order to make the energy calculations easier to read and compare between the mechanochemistry and solution-based methods, all the information has been summarised in Table S1:

**Table S1.** Energy consumption for the synthesis of complexes **3a** to **4b** at different scales

| Scale (g)                                 | Energy Consumption (kwh) | Energy Consumption (kwh.kg <sup>-1</sup> ) | Energy Consumption (MJ.kg <sup>-1</sup> ) |
|-------------------------------------------|--------------------------|--------------------------------------------|-------------------------------------------|
| <b>Mechanochemistry method</b>            |                          |                                            |                                           |
| <b>0.1</b>                                | 1.2                      | 12000                                      | 43200                                     |
| <b>1.0<sup>(P)</sup></b>                  | 1.2                      | 1200                                       | 4320                                      |
| <b>30.0<sup>(P)</sup></b>                 | 10                       | 333.3                                      | 1200                                      |
| <b>60.0<sup>(P)</sup></b>                 | 10                       | 166.7                                      | 600                                       |
| <b>120.0<sup>(P)</sup></b>                | 12.8                     | 106.7                                      | 384                                       |
| <b>Conventional solution-based method</b> |                          |                                            |                                           |
| <b>0.1</b>                                | 19.2                     | 192000                                     | 691200                                    |
| <b>1.0<sup>(P)</sup></b>                  | 19.2                     | 19200                                      | 69120                                     |
| <b>30.0<sup>(P)</sup></b>                 | 19.2                     | 640                                        | 2304                                      |
| <b>60.0<sup>(P)</sup></b>                 | 19.2                     | 320                                        | 1152                                      |
| <b>120.0<sup>(P)</sup></b>                | 19.2                     | 160                                        | 512                                       |

<sup>(P)</sup> Larger-scale projections based on literature values.<sup>1</sup>

### Energy saved

0.1 g;

% Energy saved for the synthesis of t-Bu-Salen (Al)Cl (**3a**), t-Bu-Salen (In)Cl (**3b**), t-Bu-Salophen (Al)Cl (**4a**), t-Bu-salophen (In)Cl (**4b**):

$$\% \text{ Energy saved} = \frac{691200 \frac{\text{MJ}}{\text{Kg}} - 43200 \frac{\text{MJ}}{\text{Kg}}}{691200 \frac{\text{MJ}}{\text{Kg}}} \times 100$$

**%Energy saved = 93.8 % (each complex)**

1 g;

% Energy saved for the synthesis of t-Bu-Salen (Al)Cl (**3a**), t-Bu-Salen (In)Cl (**3b**), t-Bu-Salophen (Al)Cl (**4a**), t-Bu-salophen (In)Cl (**4b**):

$$\% \text{ Energy saved} = \frac{69120 \frac{\text{MJ}}{\text{Kg}} - 4320 \frac{\text{MJ}}{\text{Kg}}}{69120 \frac{\text{MJ}}{\text{Kg}}} \times 100$$

**%Energy saved = 93.8 % (each complex)**

30 g;

% Energy saved for the synthesis of t-Bu-Salen (Al)Cl (**3a**), t-Bu-Salen (In)Cl (**3b**), t-Bu-Salophen (Al)Cl (**4a**), t-Bu-salophen (In)Cl (**4b**):

$$\% \text{ Energy saved} = \frac{2304 \frac{\text{MJ}}{\text{Kg}} - 1200 \frac{\text{MJ}}{\text{Kg}}}{2304 \frac{\text{MJ}}{\text{Kg}}} \times 100$$

**%Energy saved = 47.9 % (each complex)**

60 g;

% Energy saved for the synthesis of t-Bu-Salen (Al)Cl (**3a**), t-Bu-Salen (In)Cl (**3b**), t-Bu-Salophen (Al)Cl (**4a**), t-Bu-salophen (In)Cl (**4b**):

$$\% \text{ Energy saved} = \frac{1152 \frac{\text{MJ}}{\text{Kg}} - 600 \frac{\text{MJ}}{\text{Kg}}}{1152 \frac{\text{MJ}}{\text{Kg}}} \times 100$$

**%Energy saved = 47.9 % (each complex)**

120 g;

% Energy saved for the synthesis of t-Bu-Salen (Al)Cl (**3a**), t-Bu-Salen (In)Cl (**3b**), t-Bu-Salophen (Al)Cl (**4a**), t-Bu-salophen (In)Cl (**4b**):

$$\% \text{ Energy saved} = \frac{512 \frac{\text{MJ}}{\text{Kg}} - 384 \frac{\text{MJ}}{\text{Kg}}}{512 \frac{\text{MJ}}{\text{Kg}}} \times 100$$

**%Energy saved = 25 % (each complex)**

### ***B-3. Process mass intensity (PMI) calculations***

Mechanosynthesis of t-Bu-Salen (**1**):

***Formula used:***

$$PMI = \frac{\text{Benzaldehyde} + 1,2 - \text{ethylenediamine}}{\text{total product}}$$

$$PMI = \frac{1.01 + 0.150}{1.14}$$

**PMI = 1.02**

Mechanosynthesis of t-Bu-Salophen (**2**):

***Formula used:***

$$PMI = \frac{\text{Benzaldehyde} + 1,2 - \text{phenylenediamine}}{\text{total product}}$$

$$PMI = \frac{1.01 + 0.27}{1.213}$$

**PMI = 1.06**

Mechanosynthesis of t-Bu-Salen (Al)Cl (**3a**):

**Formula used:**

$$PMI = \frac{\text{Benzaldehyde} + 1,2\text{-ethylenediamine} + \text{Ligand used} + AlCl_3 - \text{Ligand total}}{\text{Complex total}}$$

$$PMI = \frac{0.06 + 0.03 + 0.088 + 0.037 - 0.88}{0.113}$$

$$PMI = 1.13$$

Mechanosynthesis of t-Bu-Salen (In)Cl (**3b**):

**Formula used:**

$$PMI = \frac{\text{Benzaldehyde} + 1,2\text{-ethylenediamine} + \text{Ligand used} + InCl_3 - \text{Ligand total}}{\text{Complex total}}$$

$$PMI = \frac{0.06 + 0.03 + 0.088 + 0.061 - 0.088}{0.097}$$

$$PMI = 1.55$$

Mechanosynthesis of t-Bu-Salophen (Al)Cl (**4a**):

**Formula used:**

$$PMI = \frac{\text{Benzaldehyde} + 1,2\text{-phenylenediamine} + \text{Ligand used} + AlCl_3 - \text{Ligand total}}{\text{Complex total}}$$

$$PMI = \frac{0.066 + 0.034 + 0.087 + 0.037 - 0.087}{0.096}$$

$$PMI = 1.42$$

Mechanosynthesis of t-Bu-Salophen (In)Cl (**4b**):

**Formula used:**

$$PMI = \frac{\text{Benzaldehyde} + 1,2\text{-phenylenediamine} + \text{Ligand used} + InCl_3 - \text{Ligand total}}{\text{Complex total}}$$

$$E = \frac{0.066 + 0.034 + 0.087 + 0.061 - 0.087}{0.097}$$

$$PMI = 1.66$$

Conventional solution synthesis of Conventional solution synthesis of t-Bu-Salen (**1**):

**Formula used:**

$$PMI = \frac{\text{Benzaldehyde} + 1,2\text{-ethylenediamine} + \text{ethanol (10\%)} + \text{Toluene (10\%)}}{\text{total product}}$$

$$PMI = \frac{1.01 + 0.150 + 1.184 + 0.701}{0.96}$$

$$PMI = 3.17$$

Conventional solution synthesis of t-Bu-Salophen (2)

**Formula used:**

$$PMI = \frac{\text{Benzaldehyde} + 1,2\text{-phenylenediamine} + \text{ethanol (10\%)} + \text{Toluene (10\%)}}{\text{total product}}$$

$$PMI = \frac{1.01 + 0.27 + 1.184 + 0.701}{0.96}$$

$$\mathbf{PMI = 3.30}$$

Conventional solution synthesis of t-Bu-Salen (Al)Cl (3a):

**Formula used:**

$$E = \frac{\text{Benzaldehyde} + 1,2\text{-ethylenediamine} + \text{Ligand used} + \text{AlCl}_3 + \text{EtOH} + \text{Toluene} - \text{Ligand total}}{\text{Complex total}}$$

$$PMI = \frac{0.06 + 0.03 + 0.088 + 0.027 + 1.578 - 0.077}{0.063}$$

$$\mathbf{PMI = 39.7}$$

Conventional solution synthesis of t-Bu-Salen (In)Cl (3b):

**Formula used:**

$$PMI = \frac{\text{Benzaldehyde} + 1,2\text{-ethylenediamine} + \text{Ligand used} + \text{InCl}_3 + \text{EtOH} + \text{Toluene} - \text{Ligand total}}{\text{Complex total}}$$

$$PMI = \frac{0.06 + 0.03 + 0.088 + 0.044 + 1.58 + 0.088 - 0.077}{0.063}$$

$$\mathbf{PMI = 28.8}$$

Conventional solution synthesis of t-Bu-Salophen (In)Cl (4b):

**Formula used:**

$$PMI = \frac{\text{Benzaldehyde} + 1,2\text{-phenylenediamine} + \text{Ligand used} + \text{AlCl}_3 + \text{EtOH} + \text{Toluene} - \text{Ligand total}}{\text{Complex total}}$$

$$PMI = \frac{0.066 + 0.034 + 0.087 + 0.027 + 1.58 + 0.088 - 0.076}{0.063}$$

$$\mathbf{PMI = 28.7}$$

Conventional solution synthesis of t-Bu-Salophen (Al)Cl (4a):

**Formula used:**

$$PMI = \frac{\text{Benzaldehyde} + 1,2\text{-phenylenediamine} + \text{Ligand used} + \text{InCl}_3 + \text{EtOH} + \text{Toluene} - \text{Ligand total}}{\text{Complex total}}$$

$$PMI = \frac{0.066 + 0.034 + 0.087 + 0.044 + 1.58 + 0.088 - 0.076}{0.063}$$

$$\mathbf{PMI = 28.9}$$

#### B-4. Generalized reaction mass efficiency (RME)

Mechanosynthesis of t-Bu-Salen (**1**):

**Formula used:**

$$RME = \frac{\text{Ligand total}}{\text{Benzaldehyde} + 1,2\text{-ethylenediamine}}$$
$$RME = 0.98$$

Mechanosynthesis of t-Bu-Salophen (**2**):

**Formula used:**

$$RME = \frac{\text{Ligand total}}{\text{Benzaldehyde} + 1,2\text{-phenylenediamine}}$$
$$RME = \frac{1.21}{1.01 + 0.27}$$
$$RME = 0.95$$

Mechanosynthesis of t-Bu-Salen (Al)Cl (**3a**):

**Formula used:**

$$RME = \frac{\text{Complex total}}{\text{Benzaldehyde} + 1,2\text{-ethylenediamine} + AlCl_3}$$
$$RME = \frac{0.113}{0.06 + 0.03 + 0.037}$$
$$RME = 0.89$$

Mechanosynthesis of t-Bu-Salen (In)Cl (**3b**):

**Formula used:**

$$RME = \frac{\text{Complex total}}{\text{Benzaldehyde} + 1,2\text{-ethylenediamine} + InCl_3}$$
$$RME = \frac{0.097}{0.06 + 0.03 + 0.061}$$
$$RME = 0.64$$

Mechanosynthesis of t-Bu-Salophen (Al)Cl (**4a**):

**Formula used:**

$$RME = \frac{\text{Benzaldehyde} + 1,2\text{-phenylenediamine} + \text{Ligand used} + AlCl_3 - \text{Ligand total}}{\text{Complex total}}$$
$$RME = \frac{0.096}{0.066 + 0.034 + 0.037}$$
$$RME = 0.70$$

Mechanosynthesis of t-Bu-Salophen (In)Cl (**4b**):

**Formula used:**

$$RME = \frac{\text{Complex total}}{\text{Benzaldehyde} + 1,2\text{-phenylenediamine} + \text{InCl}_3}$$
$$RME = \frac{0.097}{0.066 + 0.034 + 0.061}$$

**RME = 0.60**

Conventional solution synthesis of t-Bu-Salen (**1**):

**Formula used:**

$$RME = \frac{\text{Ligand total}}{\text{Benzaldehyde} + 1,2\text{-ethylenediamine}}$$
$$RME = \frac{0.96}{1.01 + 0.150}$$

**RME = 0.82**

Conventional solution synthesis of t-Bu-Salophen (**2**)

**Formula used:**

$$RME = \frac{\text{Ligand total}}{\text{Benzaldehyde} + 1,2\text{-phenylenediamine}}$$
$$RME = \frac{0.96}{1.01 + 0.27}$$

**RME = 0.75**

Conventional solution synthesis of t-Bu-Salen (Al)Cl (**3a**):

**Formula used:**

$$RME = \frac{\text{Complex total}}{\text{Benzaldehyde} + 1,2\text{-ethylenediamine} + \text{AlCl}_3}$$
$$RME = \frac{0.063}{0.06 + 0.03 + 0.027}$$

**RME = 0.53**

Conventional solution synthesis of t-Bu-Salen (In)Cl (**3b**):

**Formula used:**

$$RME = \frac{\text{Complex total}}{\text{Benzaldehyde} + 1,2\text{-ethylenediamine} + \text{InCl}_3}$$
$$RME = \frac{0.063}{0.06 + 0.03 + 0.044}$$

**RME = 0.47**

Conventional solution synthesis of t-Bu-Salophen (Al)Cl (**4a**):

**Formula used:**

$$RME = \frac{\text{Complex total}}{\text{Benzaldehyde} + 1,2\text{-phenylenediamine} + \text{InCl}_3}$$

$$RME = \frac{0.063}{0.066 + 0.034 + 0.044}$$

$$\mathbf{RME = 0.43}$$

Conventional solution synthesis of t-Bu-Salophen (In)Cl (**4b**):

**Formula used:**

$$RME = \frac{\text{Complex total}}{\text{Benzaldehyde} + 1,2\text{-phenylenediamine} + \text{InCl}_3}$$

$$PMI = \frac{0.063}{0.066 + 0.034 + 0.027}$$

$$\mathbf{RME = 0.49}$$

## C. NMR, FT-IR and UV-vis spectra, TOF-MS analysis, spectra photophysical measurements and X-ray structure.

### C-1-1. NMR spectra

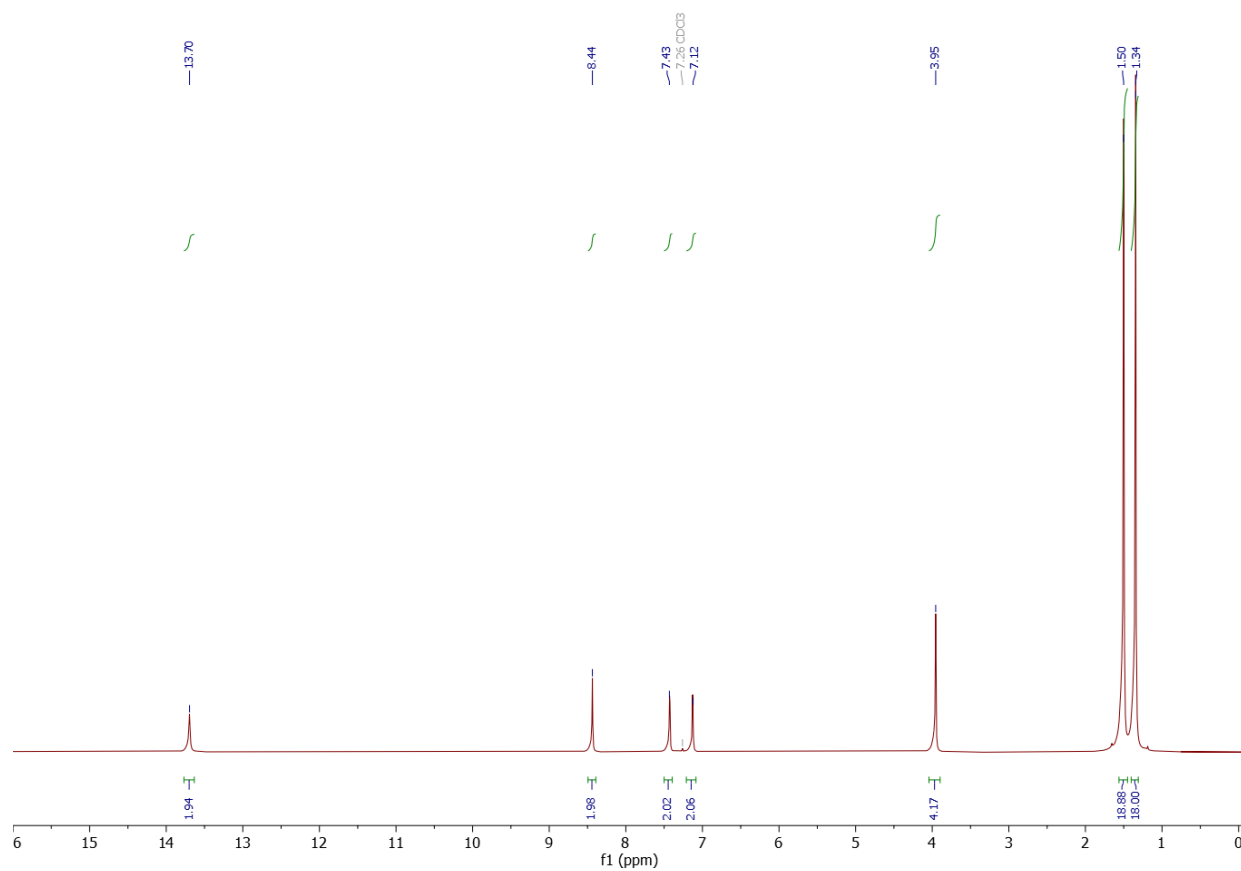

Figure S1.  $^1\text{H}$  NMR spectrum of **1** in  $\text{CD}_2\text{Cl}_2$

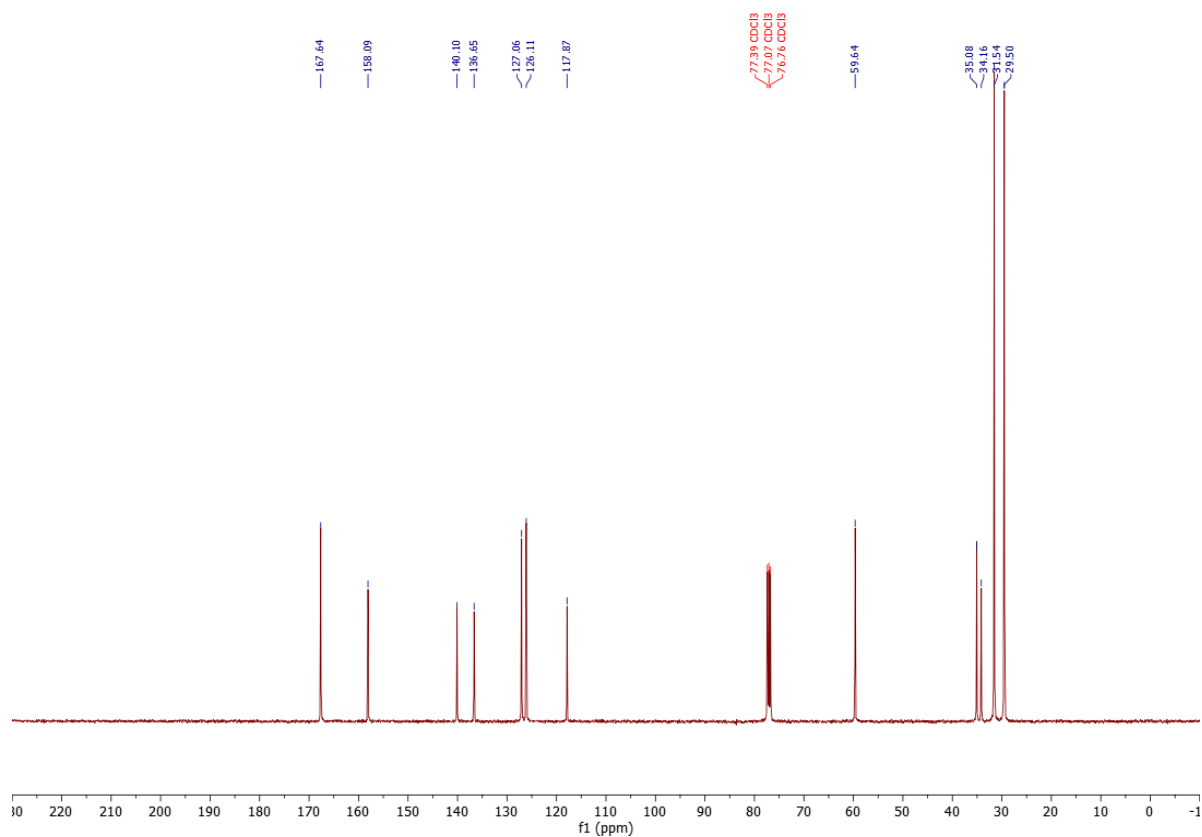

Figure S2.  $^{13}\text{C}\{^1\text{H}\}$  spectrum of **1** in  $\text{CD}_2\text{Cl}_2$



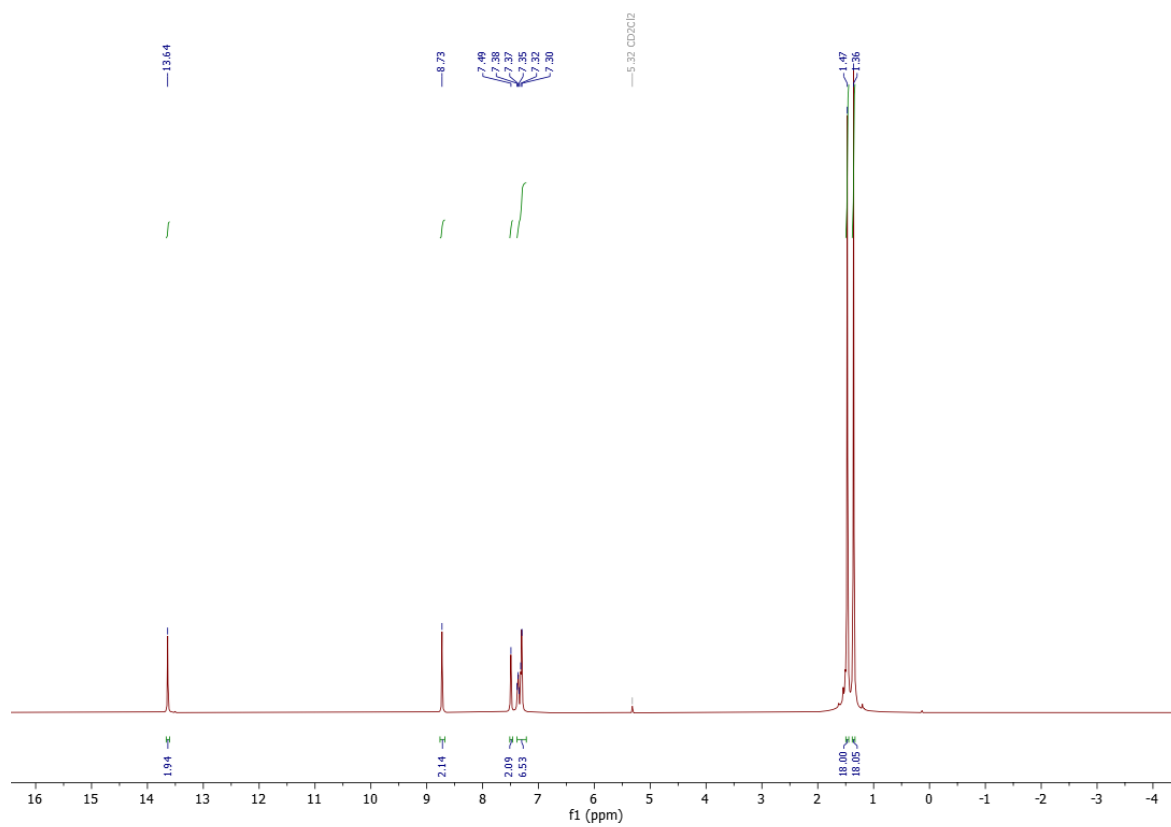

Figure S3. <sup>1</sup>H NMR spectrum of **2** in CD<sub>2</sub>Cl<sub>2</sub>

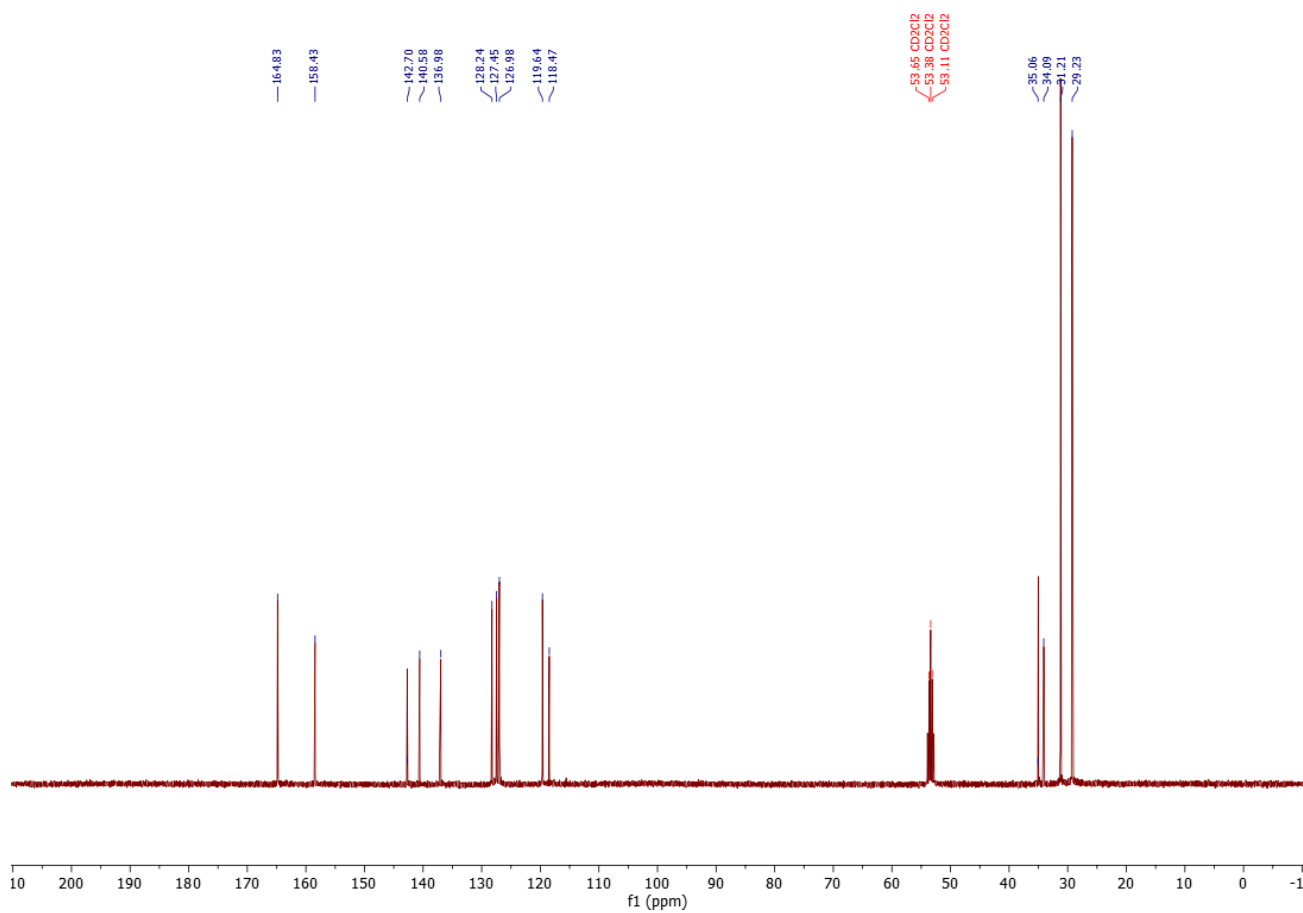

Figure S4. <sup>13</sup>C{<sup>1</sup>H} NMR spectrum of **2** in CD<sub>2</sub>Cl<sub>2</sub>

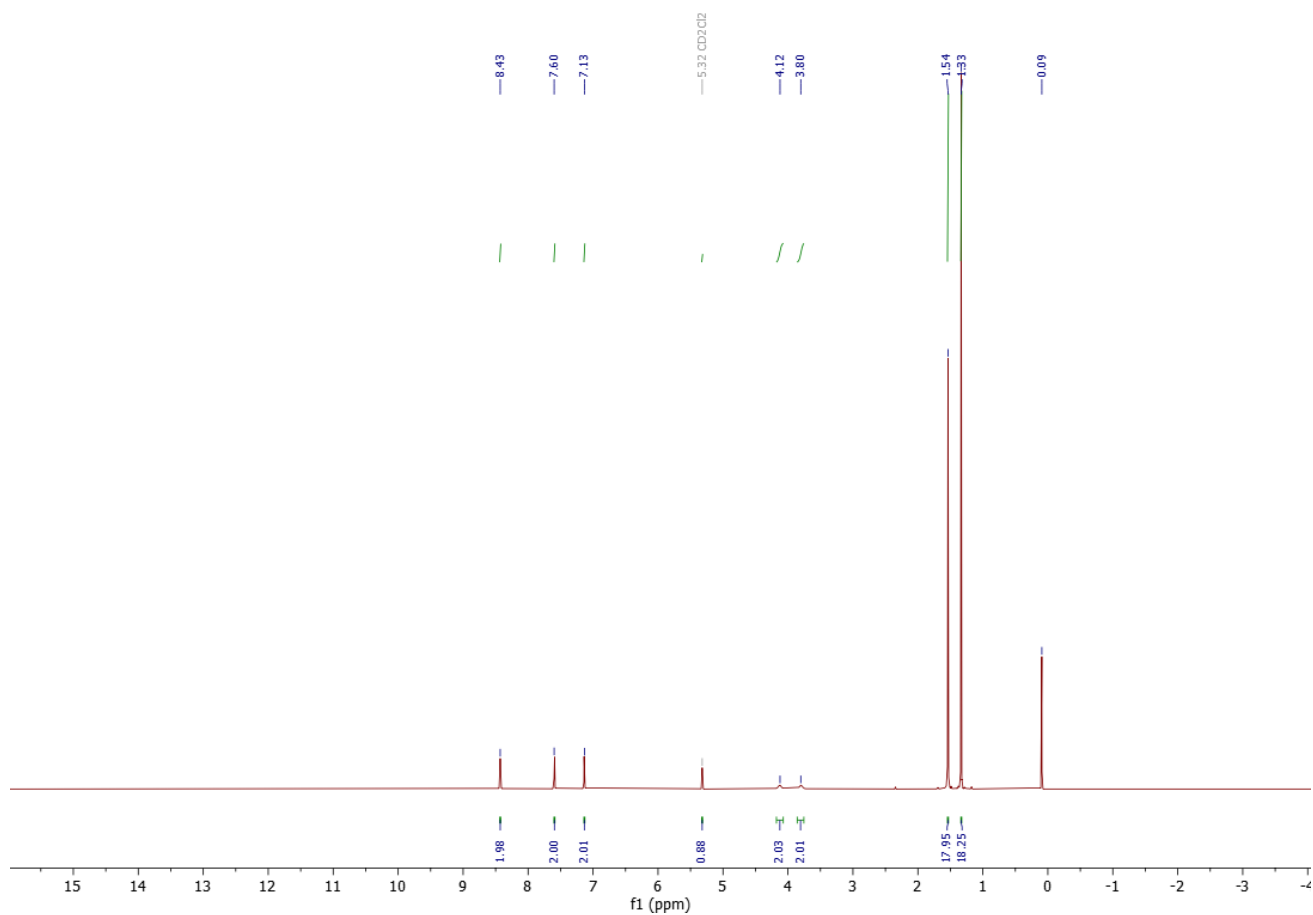

**Figure S5.**  $^1\text{H}$  NMR spectrum of **3a** in  $\text{CD}_2\text{Cl}_2$

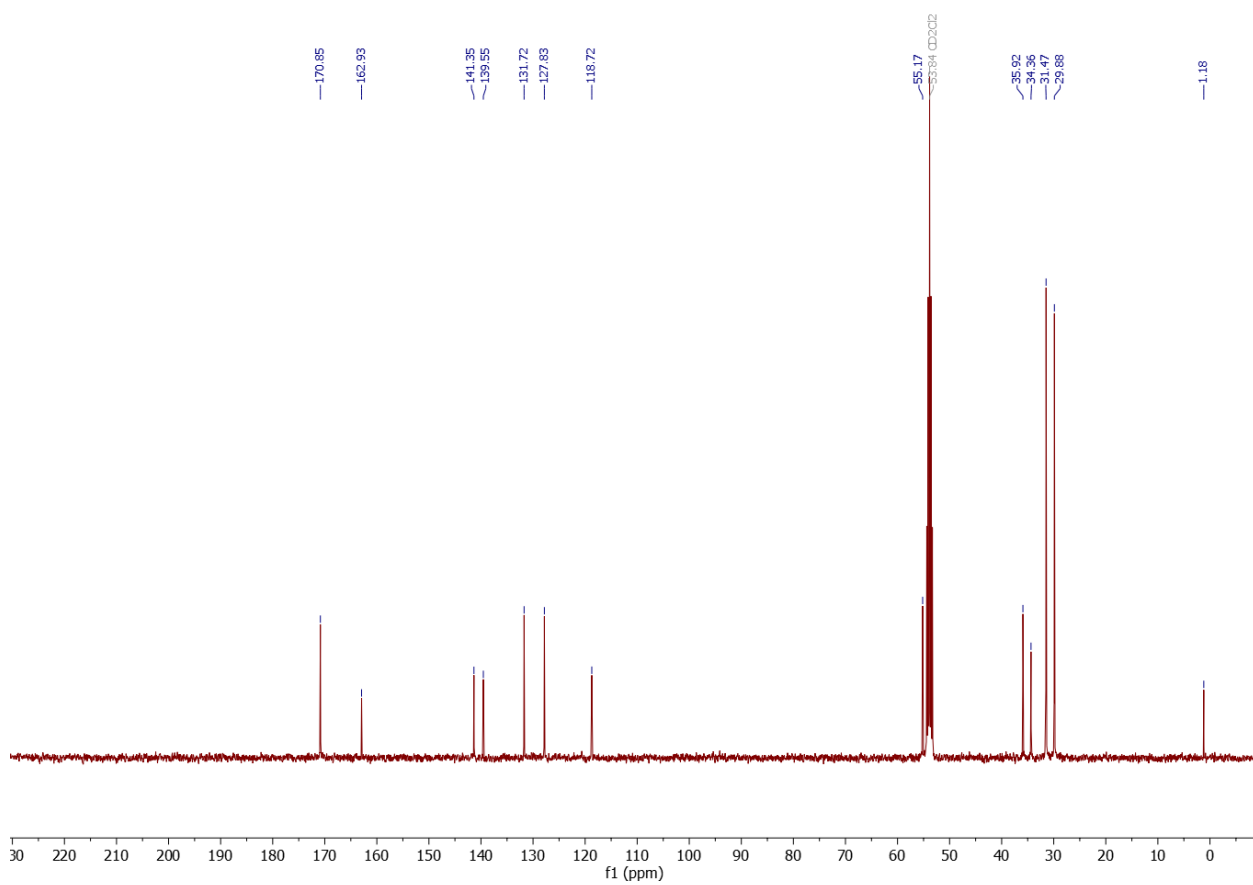

**Figure S6.**  $^{13}\text{C}\{^1\text{H}\}$  NMR spectrum of **3a** in  $\text{CD}_2\text{Cl}_2$

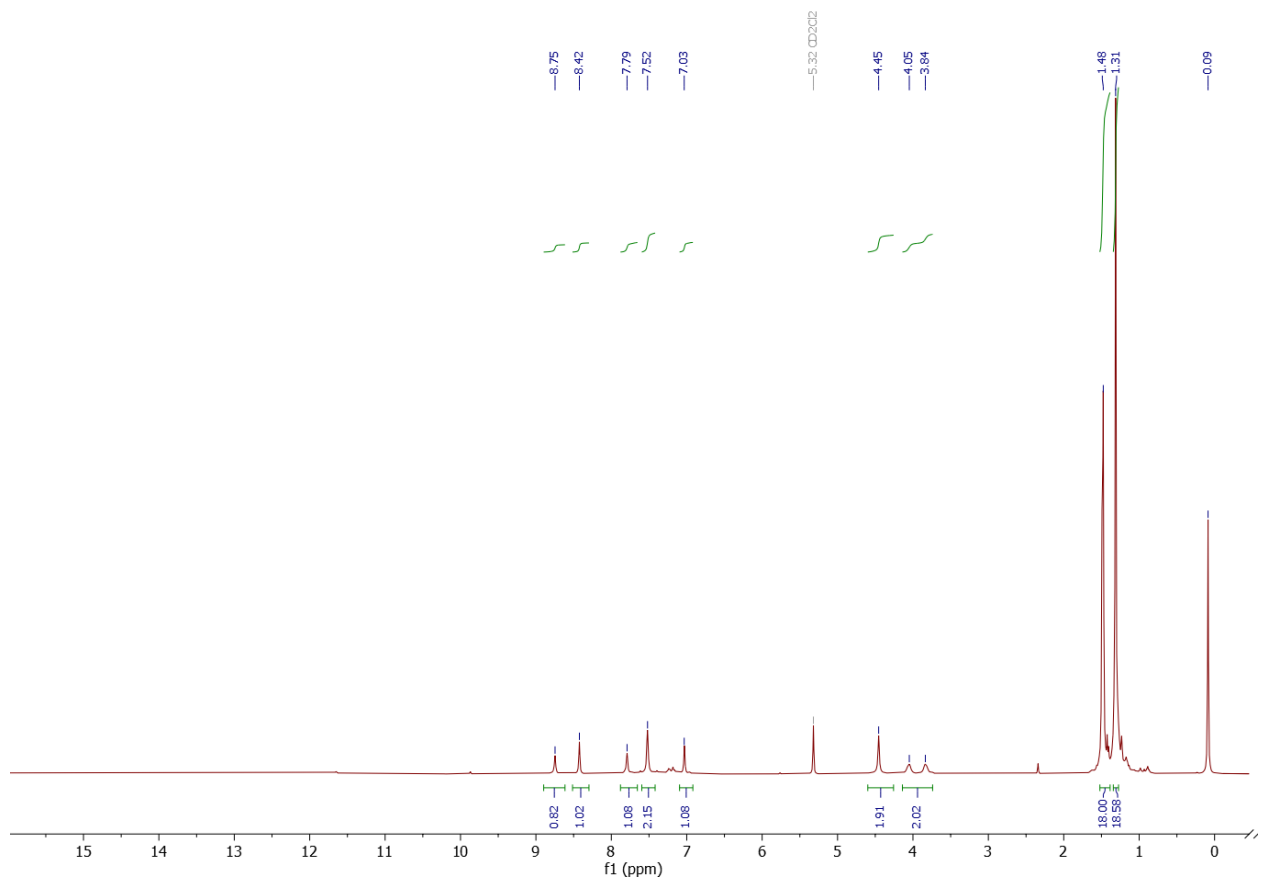

**Figure S7.**  $^1\text{H}$  NMR spectrum of **3b** in  $\text{CD}_2\text{Cl}_2$

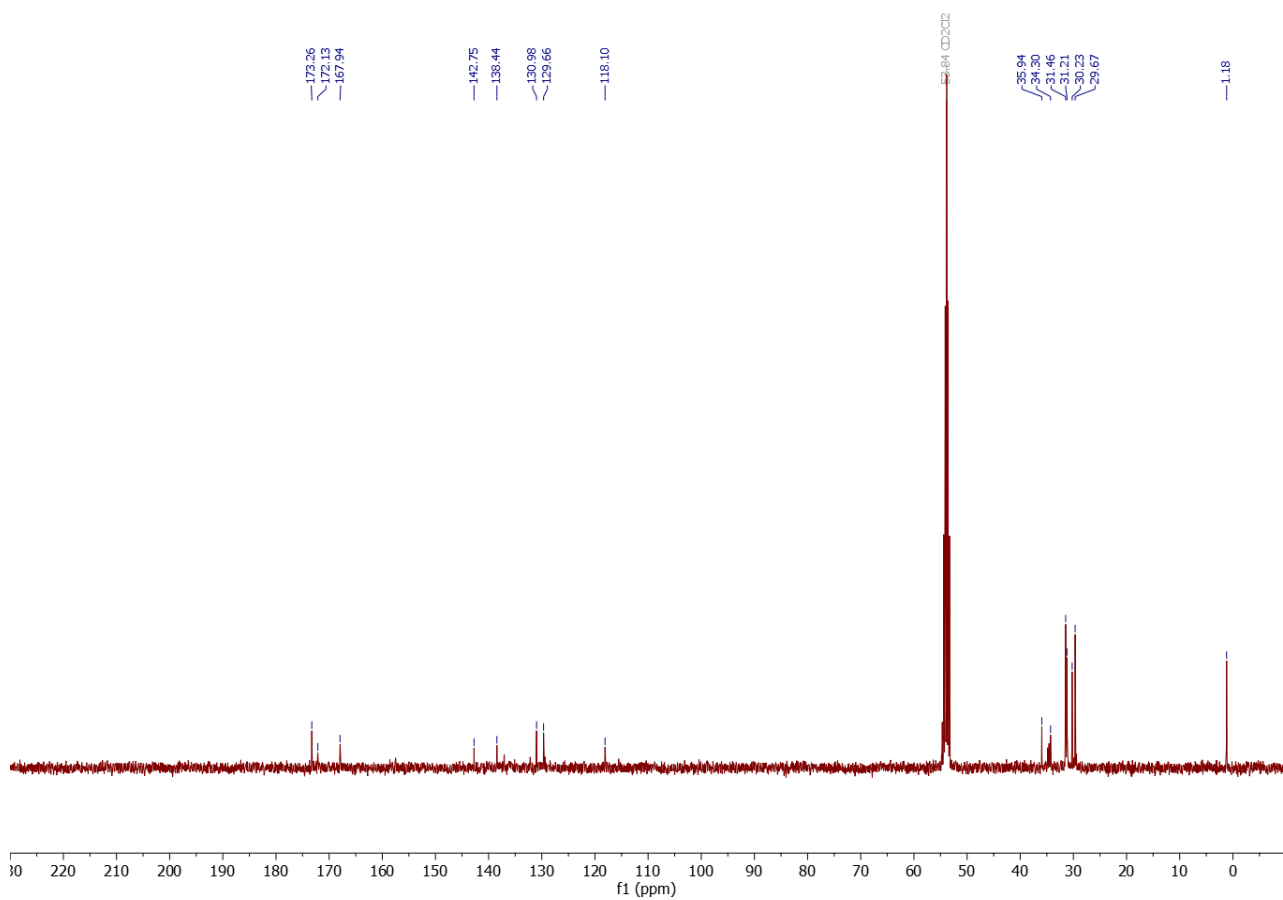

**Figure S8.**  $^{13}\text{C}\{^1\text{H}\}$  NMR spectrum of **3b** in  $\text{CD}_2\text{Cl}_2$

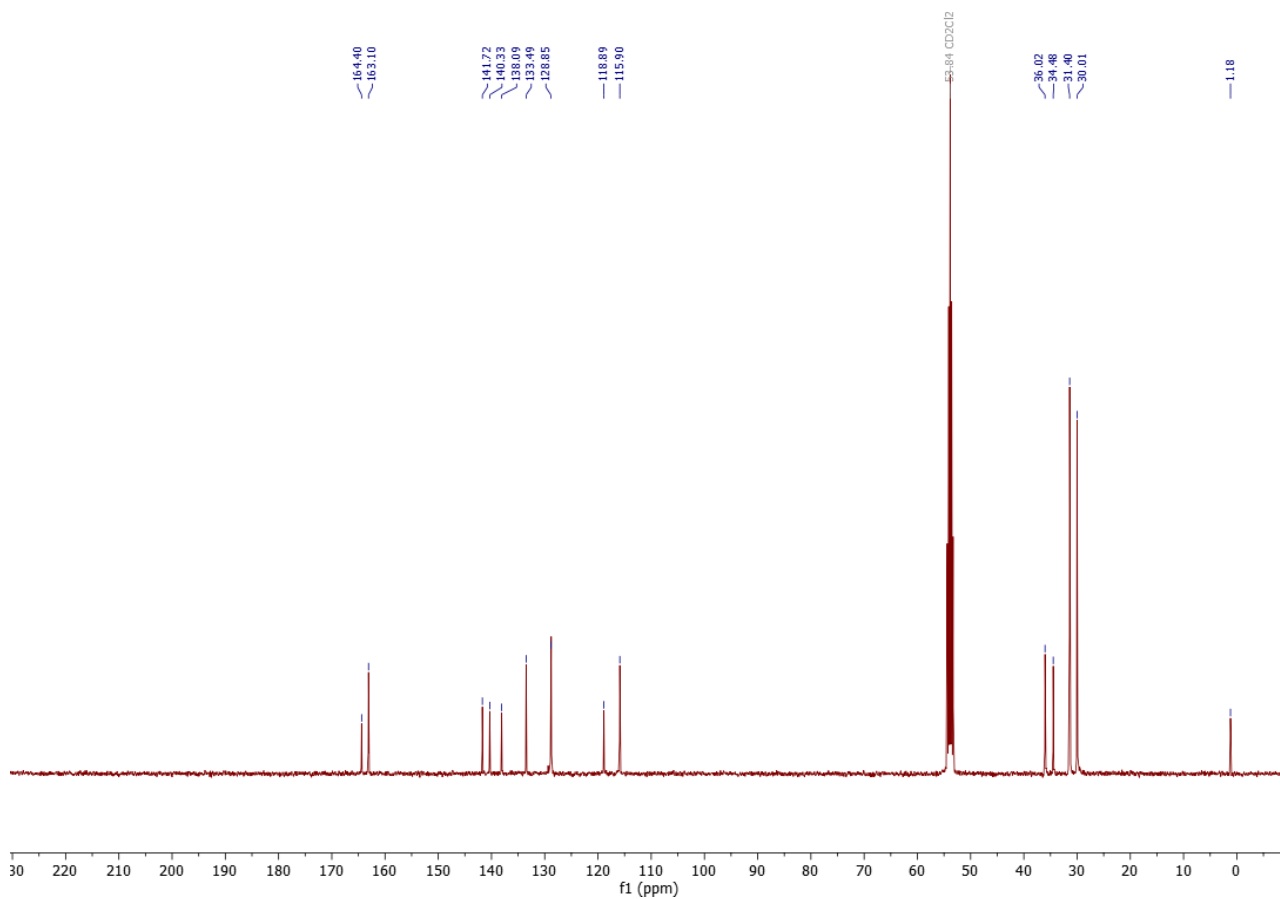

**Figure S9.** <sup>1</sup>H NMR spectrum of **4a** in CD<sub>2</sub>Cl<sub>2</sub>

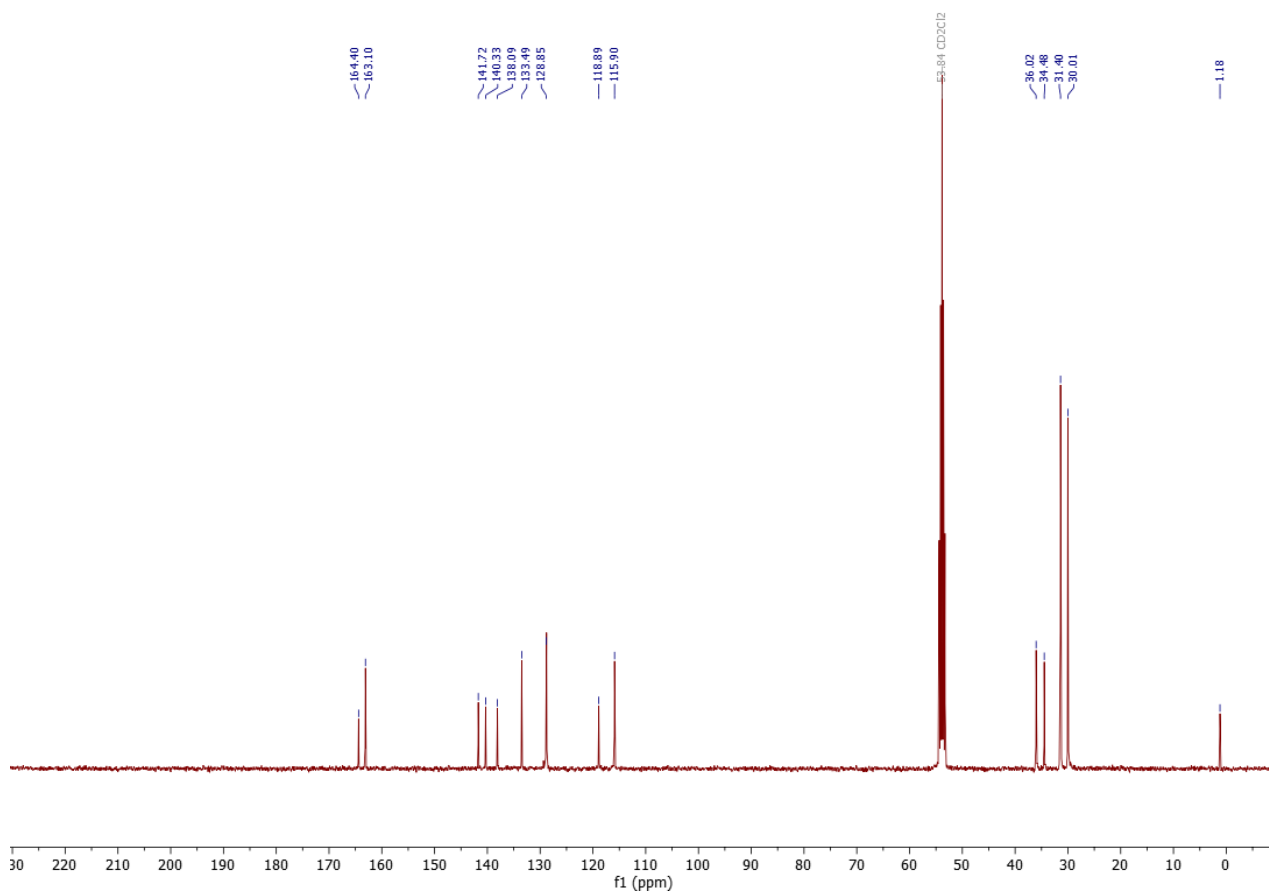

**Figure S10.** <sup>13</sup>C{<sup>1</sup>H} NMR spectrum of **4a** in CD<sub>2</sub>Cl<sub>2</sub>

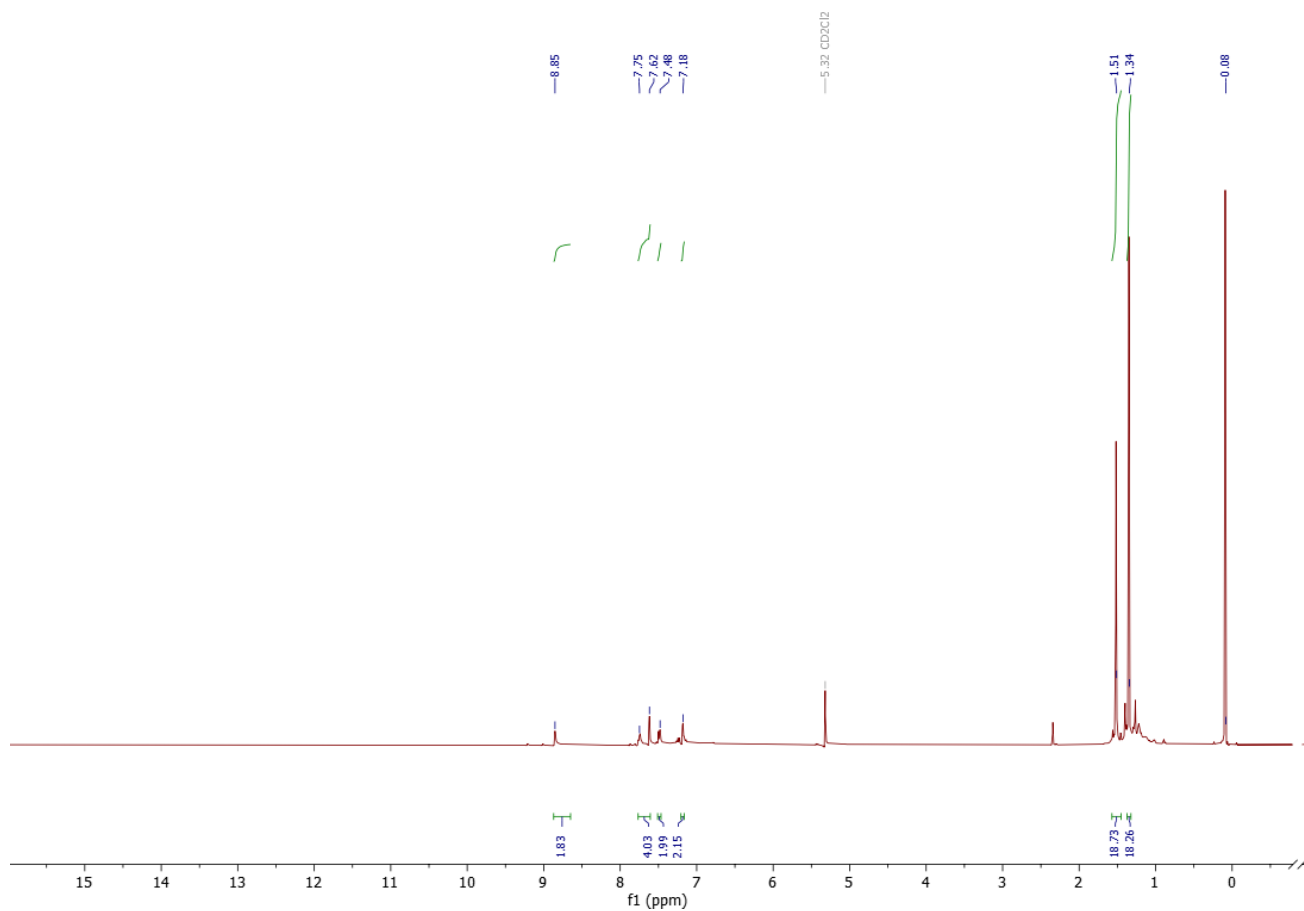

**Figure S11.**  $^1\text{H}$  NMR spectrum of **4b** in  $\text{CD}_2\text{Cl}_2$

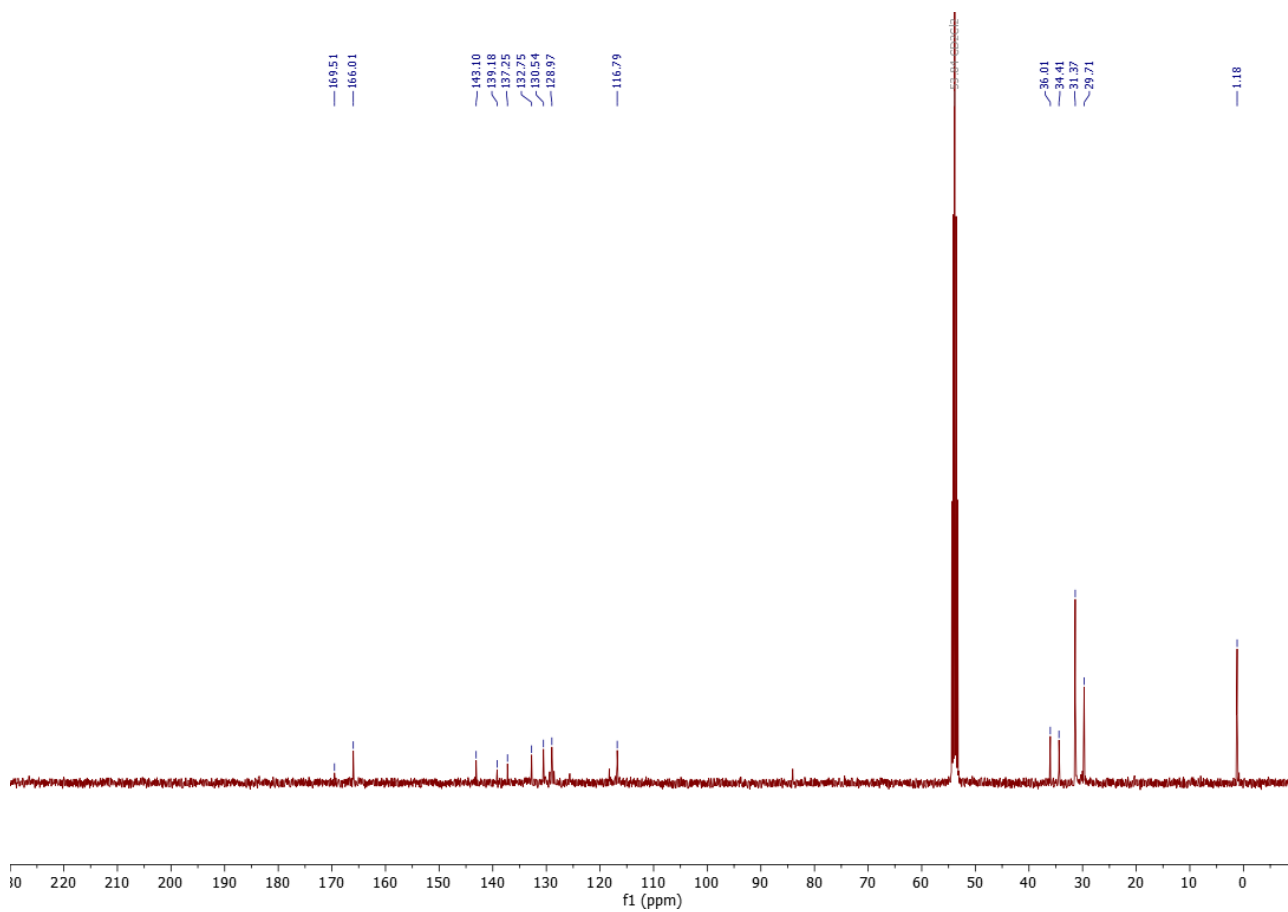

**Figure S12.**  $^{13}\text{C}\{^1\text{H}\}$  NMR spectrum of **4b** in  $\text{CD}_2\text{Cl}_2$

## C-1-2. FT-IR spectra

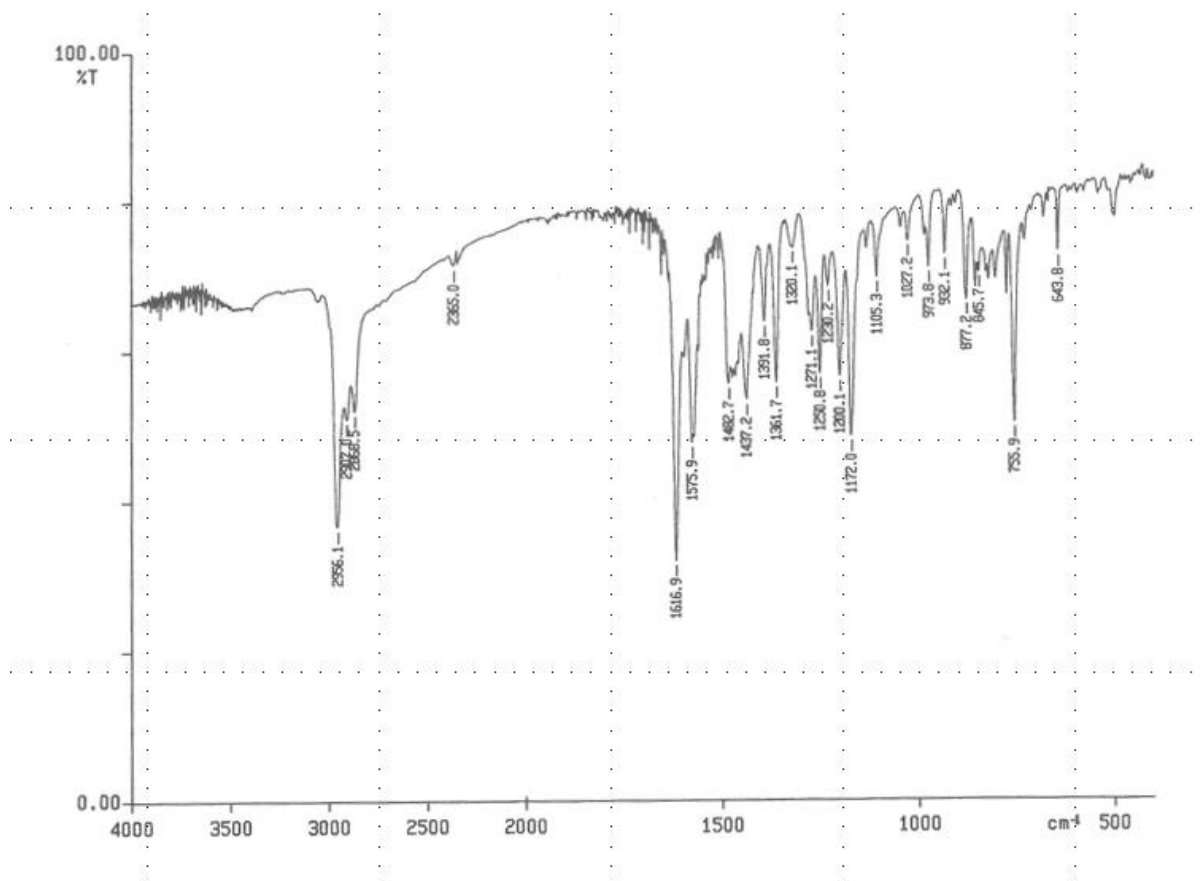

Figure S13. FT-IR spectrum of 1 in KBr

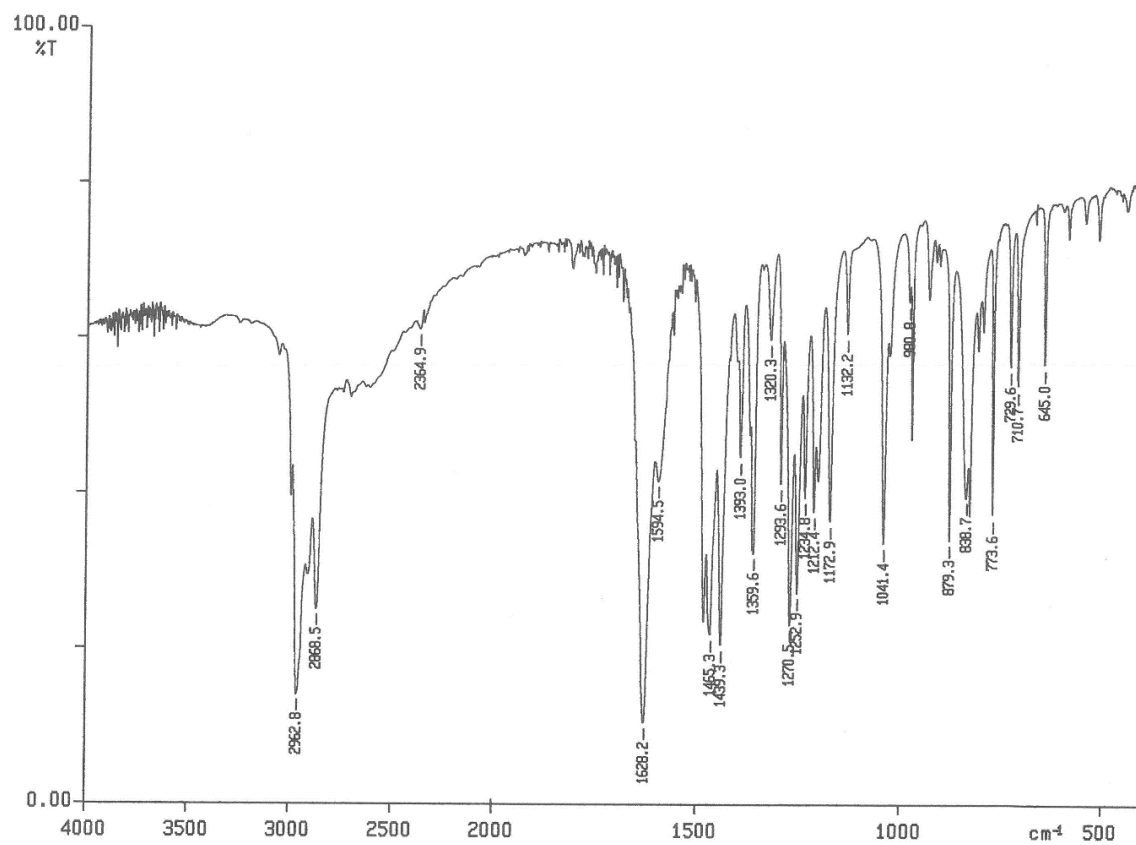

Figure S14. FT-IR spectrum of 2 in KBr

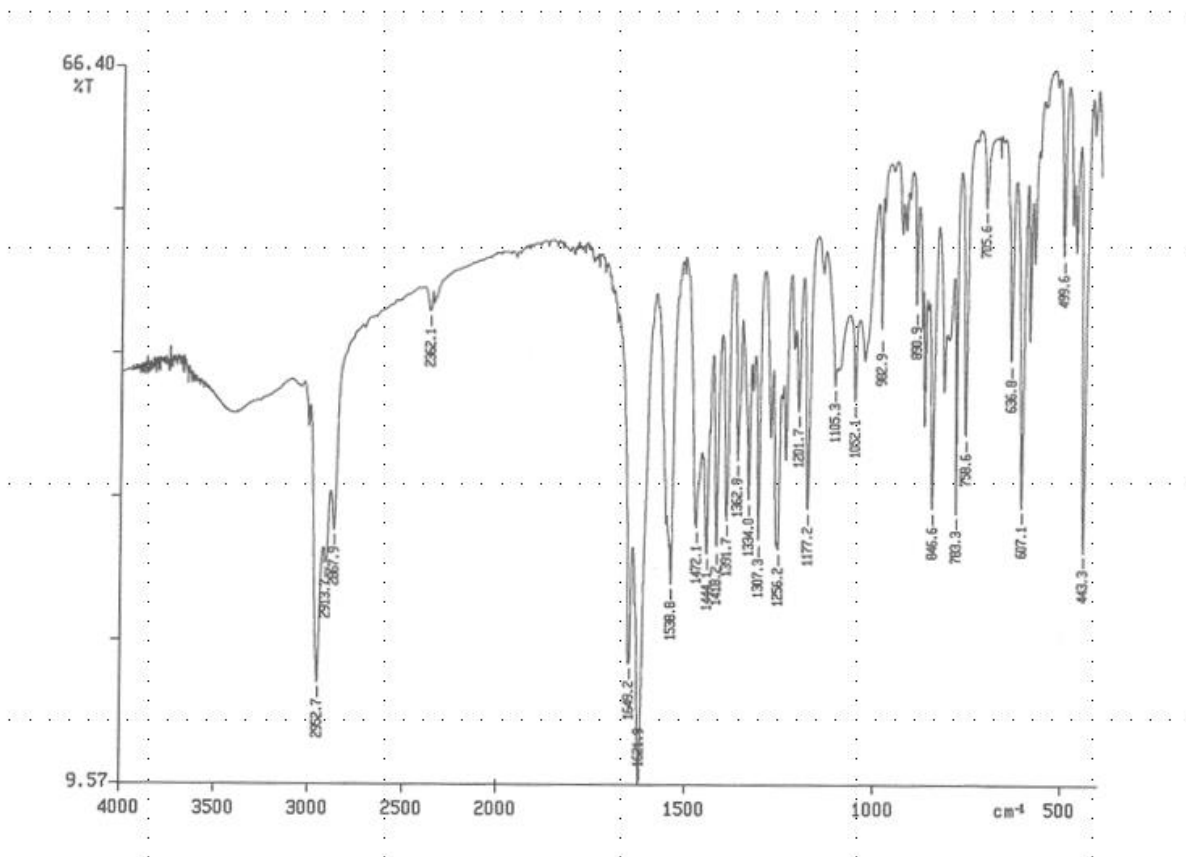

Figure S15. FT-IR spectrum of **3a** in KBr

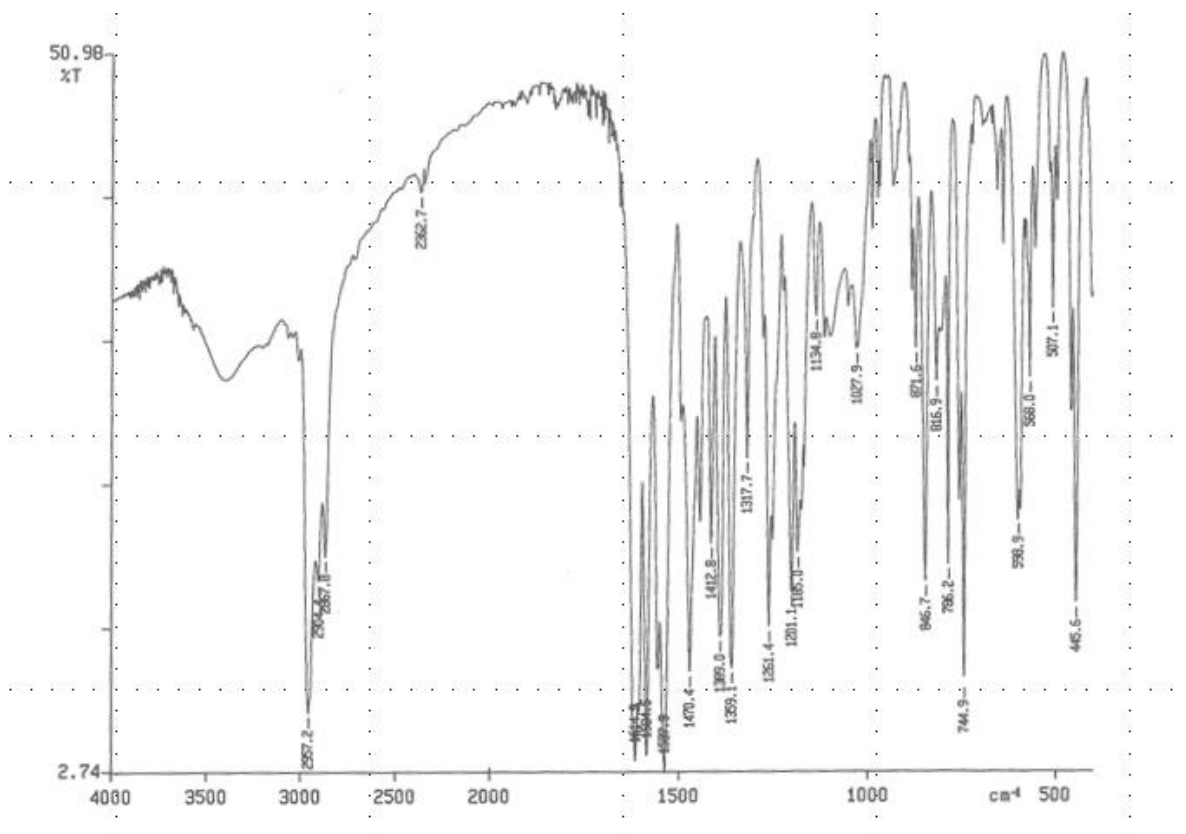

Figure S16. FT-IR spectrum of **3b** in KBr

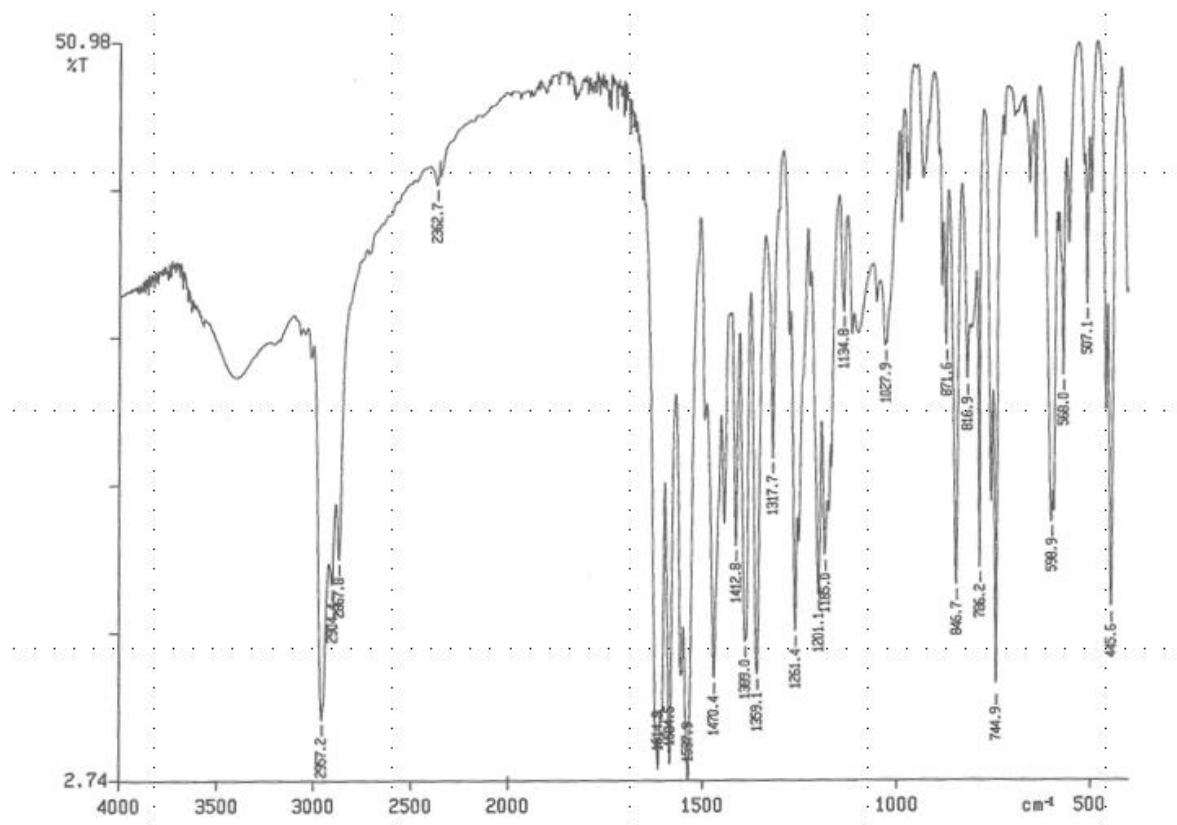

Figure S17. FT-IR spectrum of **4a** in KBr

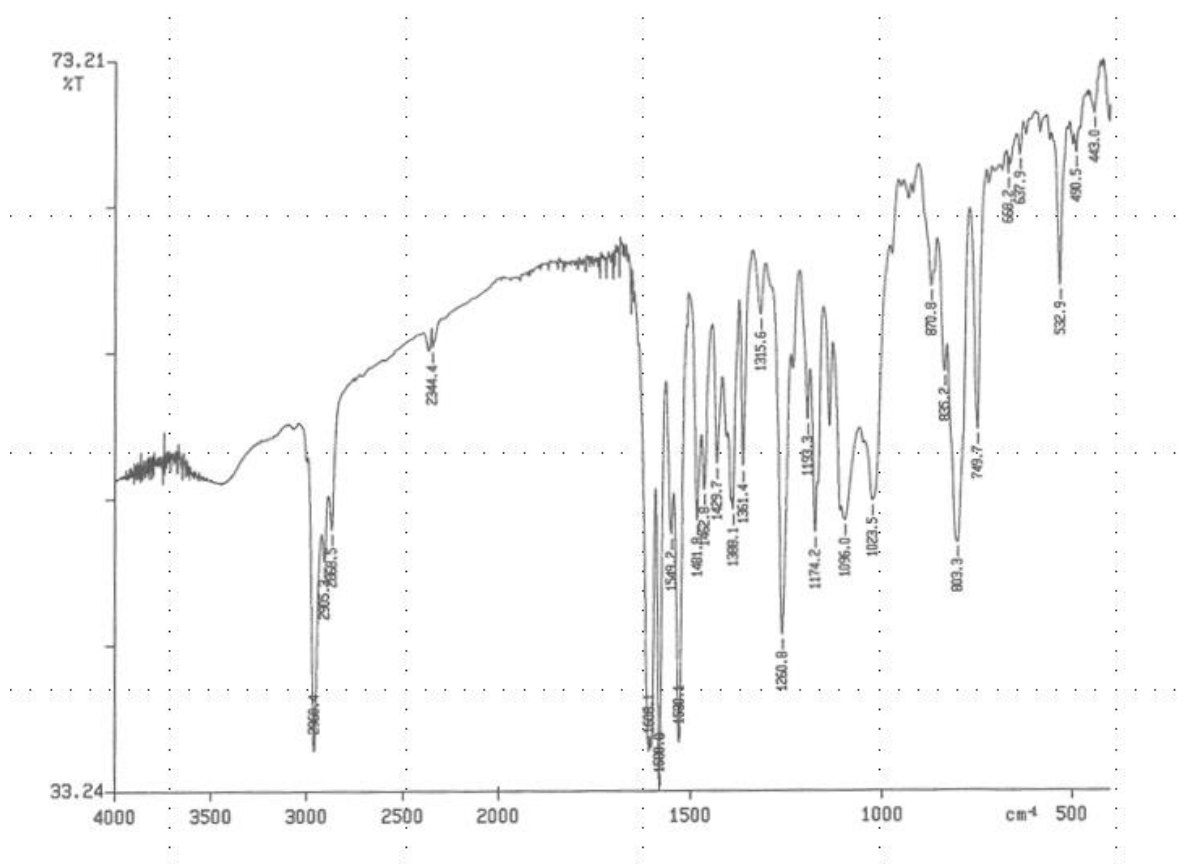

Figure S18. FT-IR spectrum of **4b** in KBr



### C-1-3. UV-Vis spectra

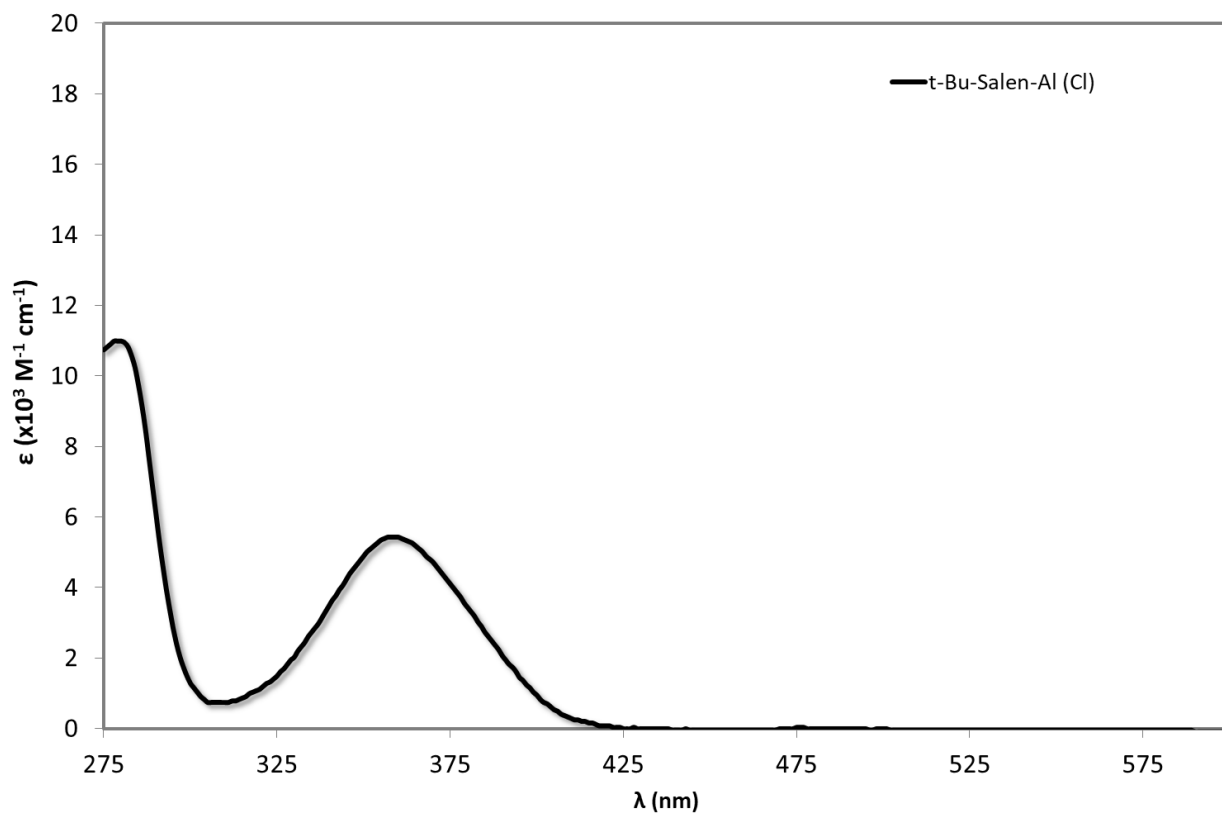

**Figure S19.** UV-VIS spectrum of **3a** in DMSO

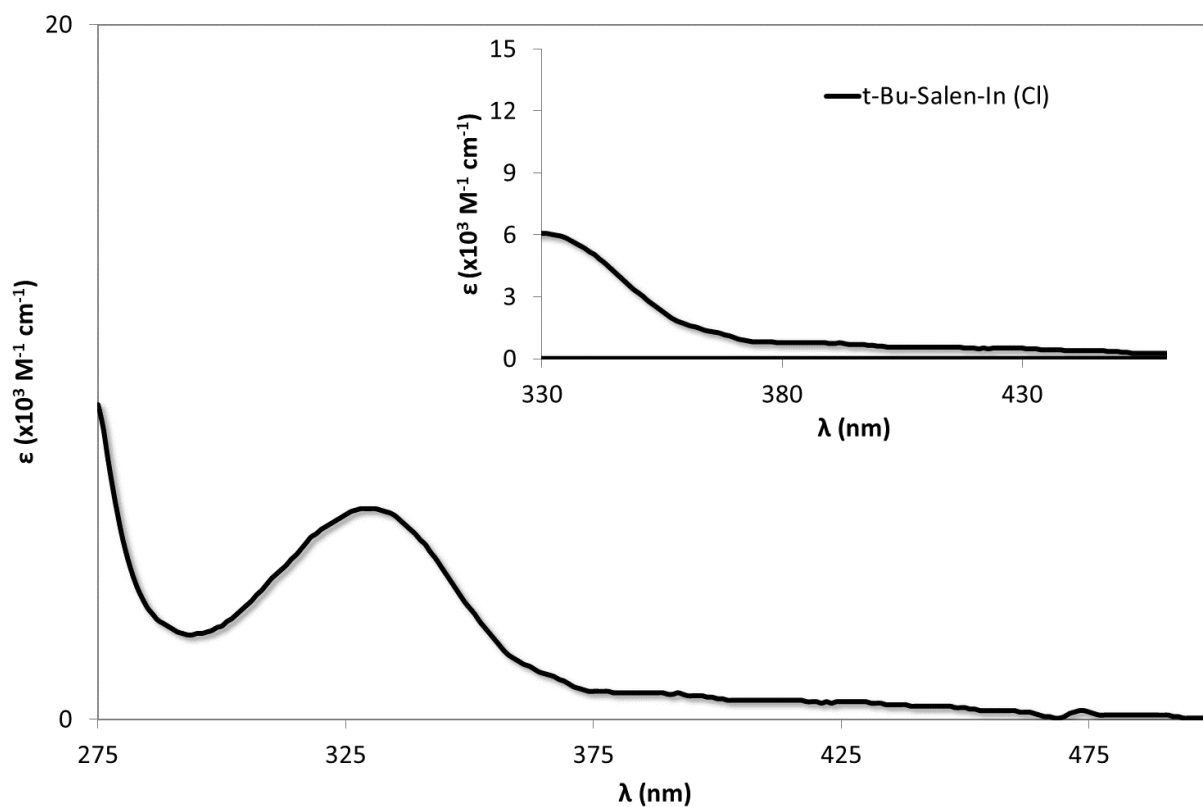

**Figure S20.** UV-VIS spectrum of **3b** in DMSO

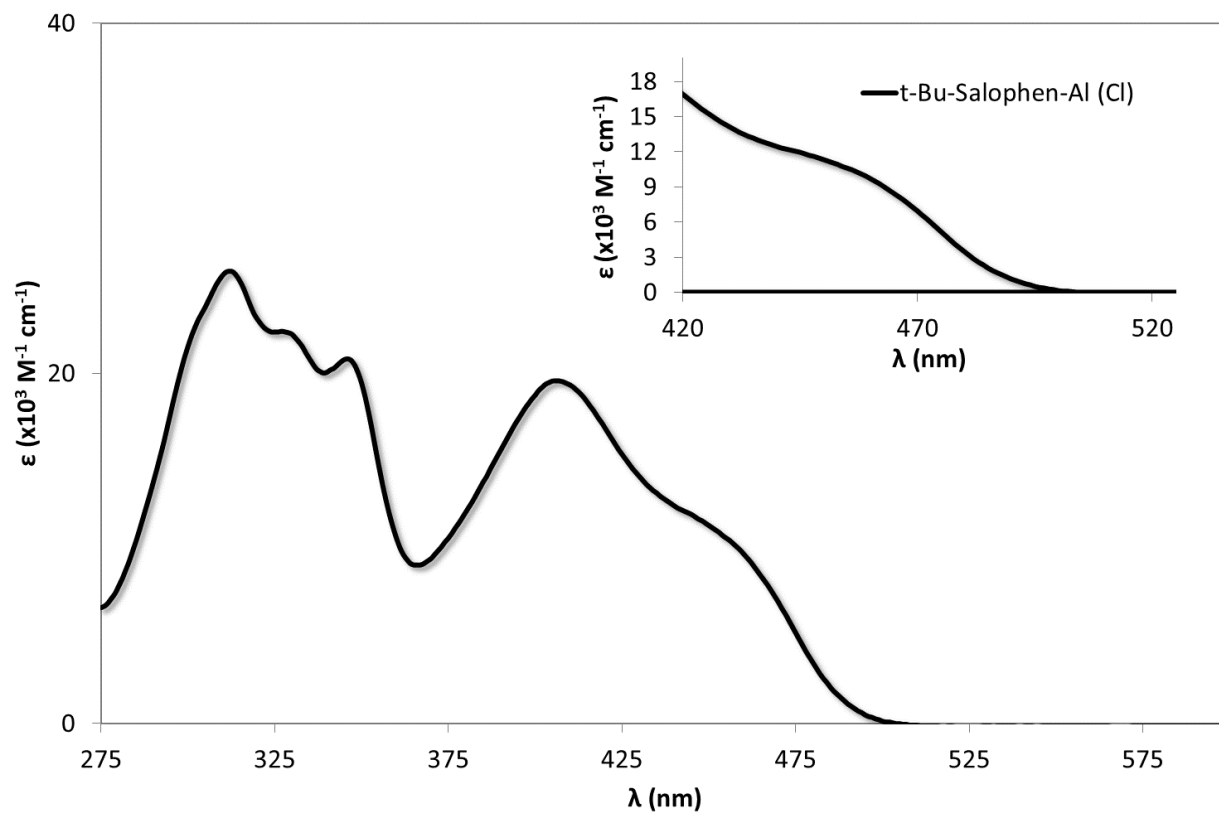

**Figure S21.** UV-VIS spectrum of **4a** in DMSO

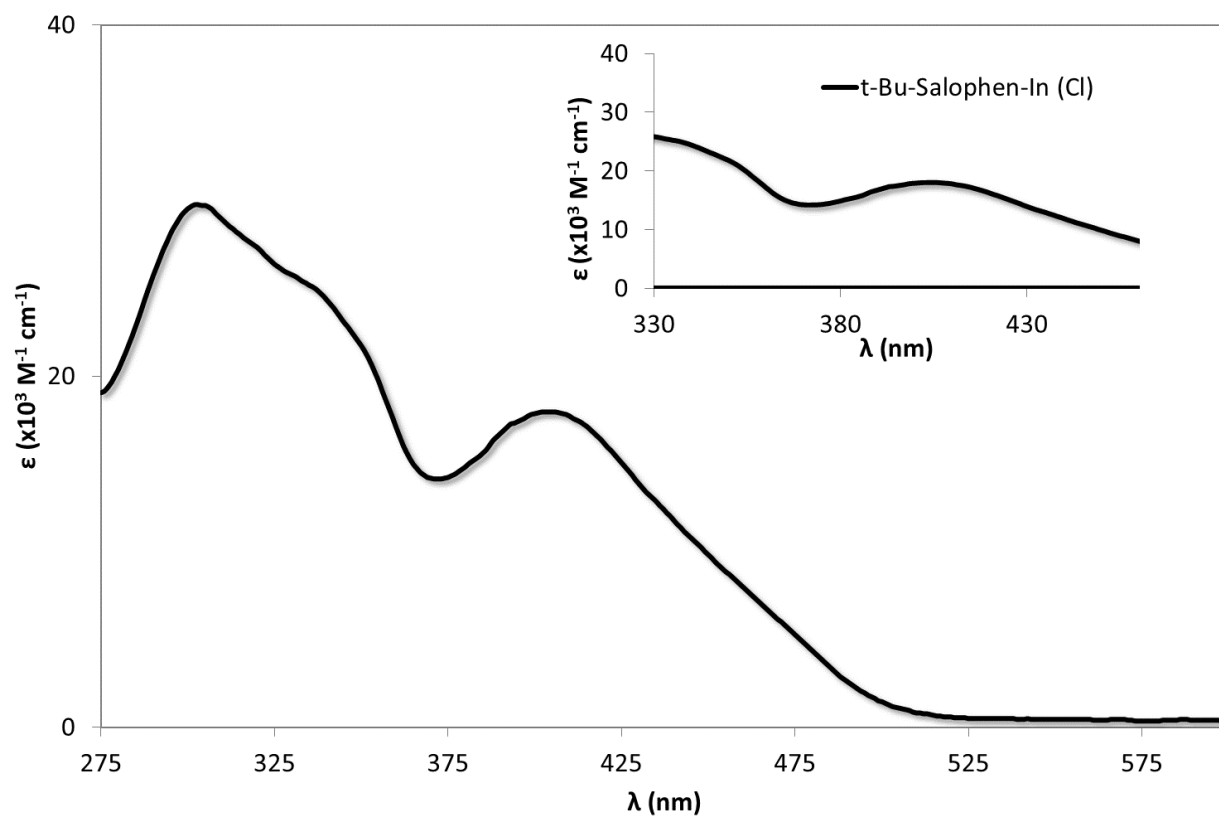

**Figure S22.** UV-VIS spectrum of **4b** in DMSO

## C-1-4. TOF-MS analysis

### Elemental Composition Report

Page 1

#### Single Mass Analysis

Tolerance = 20.0 PPM / DBE: min = -1.5, max = 60.0

Element prediction: Off

Number of isotope peaks used for i-FIT = 3

Monoisotopic Mass, Even Electron Ions

2 formula(e) evaluated with 1 results within limits (all results (up to 1000) for each mass)

Elements Used:

C: 32-32 H: 46-46 N: 1-2 O: 2-2 Al: 0-3

C<sub>32</sub>H<sub>46</sub>ClAlN<sub>2</sub>O<sub>2</sub>

Al-salen 31 (0.581)

1: TOF MS ES+  
4.74e+04

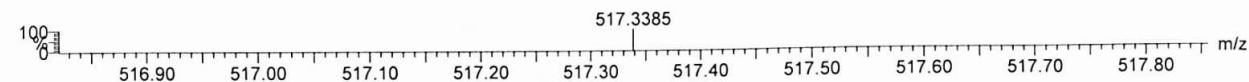

Minimum: -1.5  
Maximum: 5.0 20.0 60.0

| Mass     | Calc. Mass | mDa | PPM | DBE  | i-FIT | Norm | Conf(%) | Formula          |
|----------|------------|-----|-----|------|-------|------|---------|------------------|
| 517.3385 | 517.3375   | 1.0 | 1.9 | 11.5 | 34.1  | n/a  | n/a     | C32 H46 N2 O2 Al |

**Figure S23.** Single mass analysis report of **3a** done by WATERS XEVO G2-X2 ESI-TOF.

### Elemental Composition Report

Page 1

#### Single Mass Analysis

Tolerance = 20.0 PPM / DBE: min = -1.5, max = 60.0

Element prediction: Off

Number of isotope peaks used for i-FIT = 3

Monoisotopic Mass, Even Electron Ions

2 formula(e) evaluated with 1 results within limits (all results (up to 1000) for each mass)

Elements Used:

C: 32-36 H: 46-46 N: 1-2 O: 2-2 In: 0-1

C<sub>32</sub>H<sub>46</sub>ClInN<sub>2</sub>O<sub>2</sub>

In-salen 88 (1.584)

1: TOF MS ES+  
2.17e+003

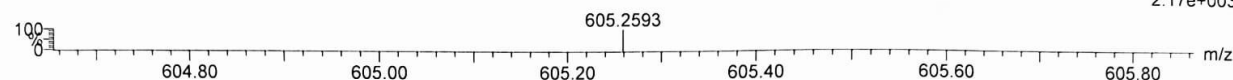

Minimum: -1.5  
Maximum: 5.0 20.0 60.0

| Mass     | Calc. Mass | mDa  | PPM  | DBE  | i-FIT | Norm | Conf(%) | Formula          |
|----------|------------|------|------|------|-------|------|---------|------------------|
| 605.2593 | 605.2598   | -0.5 | -0.8 | 11.5 | 8.2   | n/a  | n/a     | C32 H46 N2 O2 In |

**Figure S24.** Single mass analysis report of **3b** done by WATERS XEVO G2-X2 ESI-TOF.

Single Mass Analysis

Tolerance = 20.0 PPM / DBE: min = -1.5, max = 60.0  
 Element prediction: Off  
 Number of isotope peaks used for i-FIT = 3

Monoisotopic Mass, Even Electron Ions  
 2 formula(e) evaluated with 1 results within limits (all results (up to 1000) for each mass)  
 Elements Used:  
 C: 36-36 H: 46-46 N: 1-2 O: 2-2 Al: 0-3  
 C<sub>36</sub>H<sub>46</sub>ClAlN<sub>2</sub>O<sub>2</sub>  
 Al-salophen 44 (0.801)

1: TOF MS ES+  
 1.60e+002

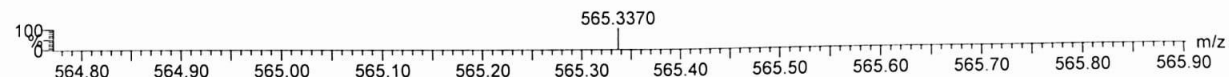

| Minimum: |            |      |      |      |       |      |          |                                                                  |  |
|----------|------------|------|------|------|-------|------|----------|------------------------------------------------------------------|--|
| Maximum: |            | 5.0  | 20.0 |      | -1.5  |      |          |                                                                  |  |
|          |            |      |      |      | 60.0  |      |          |                                                                  |  |
| Mass     | Calc. Mass | mDa  | PPM  | DBE  | i-FIT | Norm | Conf (%) | Formula                                                          |  |
| 565.3370 | 565.3375   | -0.5 | -0.9 | 15.5 | 20.0  | n/a  | n/a      | C <sub>36</sub> H <sub>46</sub> N <sub>2</sub> O <sub>2</sub> Al |  |

Figure S25. Single mass analysis report of 4a done by WATERS XEVO G2-X2 ESI-TOF.

Single Mass Analysis

Tolerance = 20.0 PPM / DBE: min = -1.5, max = 60.0  
 Element prediction: Off  
 Number of isotope peaks used for i-FIT = 3

Monoisotopic Mass, Even Electron Ions  
 3 formula(e) evaluated with 1 results within limits (all results (up to 1000) for each mass)  
 Elements Used:  
 C: 32-36 H: 46-46 N: 1-2 O: 2-2 In: 0-1

C<sub>36</sub>H<sub>46</sub>ClInN<sub>2</sub>O<sub>2</sub>  
 In-salophen 195 (3.454)

1: TOF MS ES+  
 9.83e+002

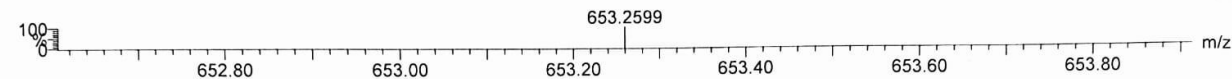

| Minimum: |            |     |      |      |       |      |          |                                                                  |
|----------|------------|-----|------|------|-------|------|----------|------------------------------------------------------------------|
| Maximum: |            | 5.0 | 20.0 |      | -1.5  |      |          |                                                                  |
|          |            |     |      |      | 60.0  |      |          |                                                                  |
| Mass     | Calc. Mass | mDa | PPM  | DBE  | i-FIT | Norm | Conf (%) | Formula                                                          |
| 653.2599 | 653.2598   | 0.1 | 0.2  | 15.5 | 8.3   | n/a  | n/a      | C <sub>36</sub> H <sub>46</sub> N <sub>2</sub> O <sub>2</sub> In |

Figure S26. Single mass analysis report of 4b done by WATERS XEVO G2-X2 ESI-TOF.

C-1-5. Lifetime and CIE

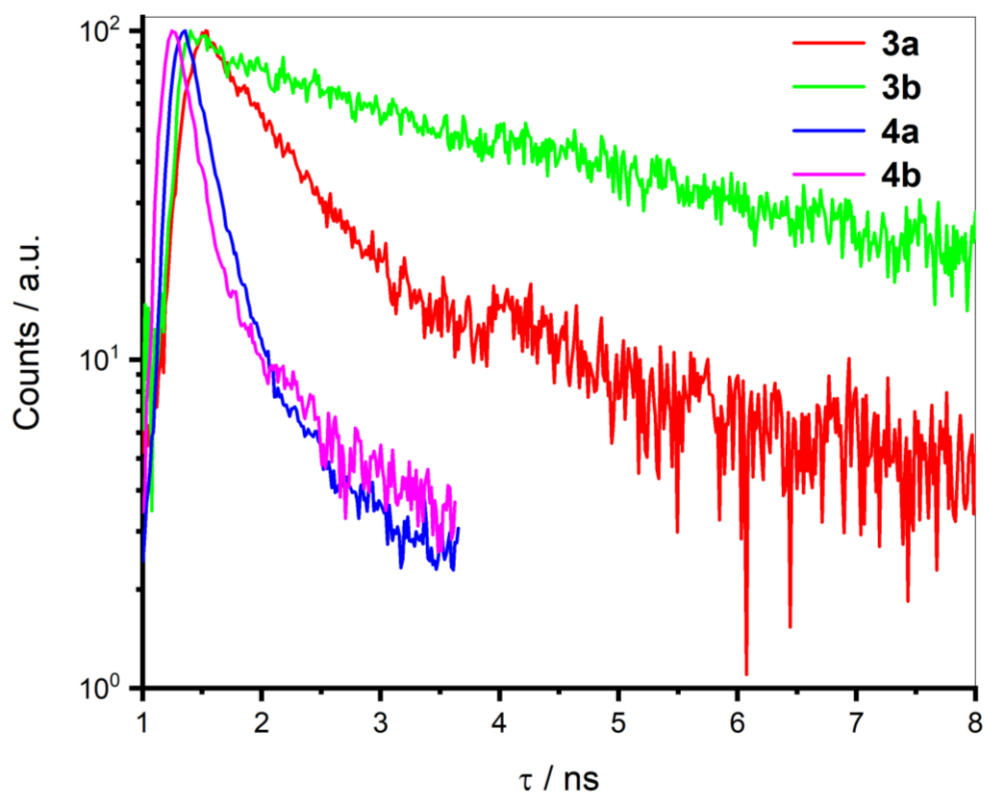

Figure S27. Lifetime of complexes **3a-4b** excited at 400 nm.

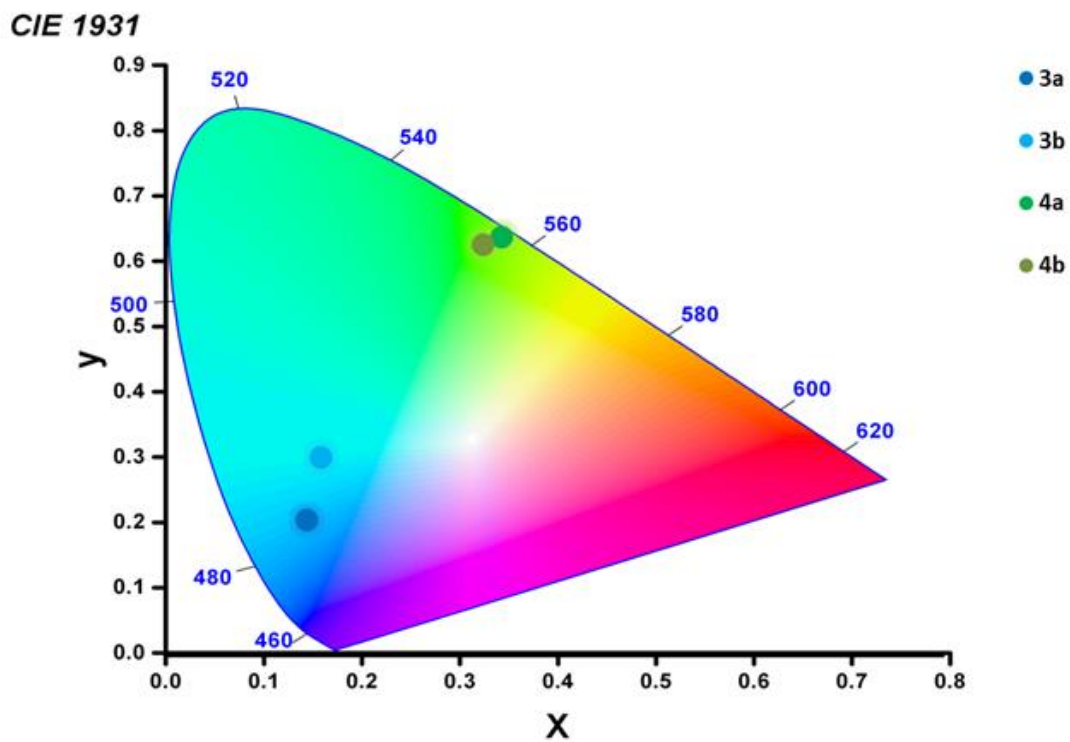

Figure S28. CIE1931 of complexes **3a-4b** excited at 360 nm.

### C-1-6. X-Ray structure

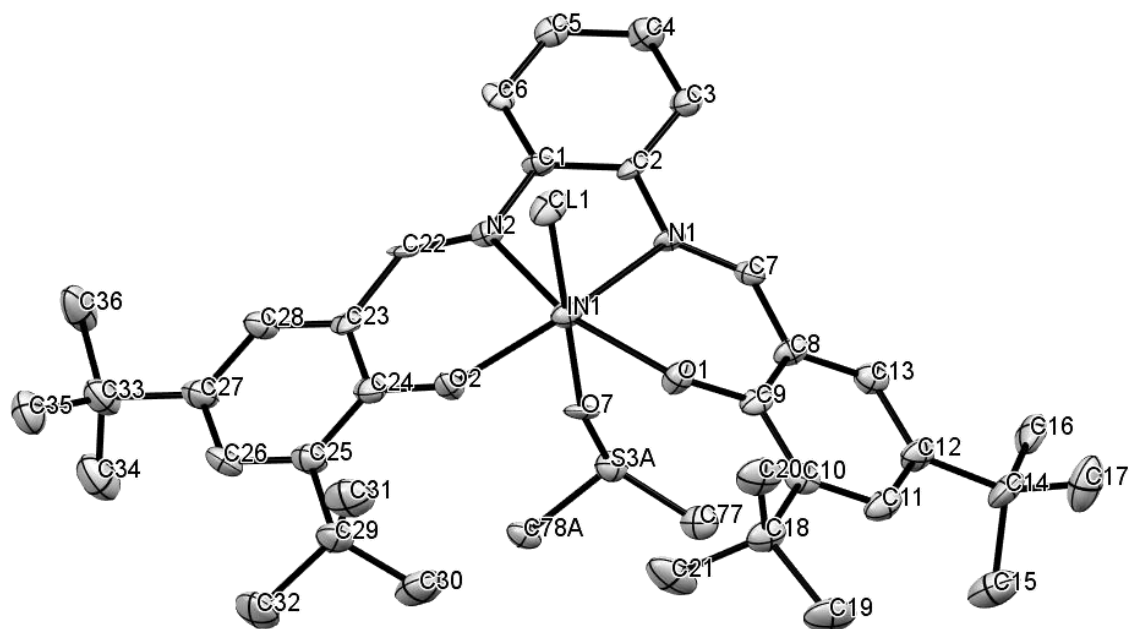

**Figure S29.** ORTEP structure of **4b** (drawn with 50% probability, top). H-atoms are removed for clarity, selected Bond Lengths [ $\text{\AA}$ ] and Angles [deg]: In(1)–Cl(1) 2.458, In(1)–O(7) 2.309, In(1)–O(1) 2.073, In(1)–O(2) 2.068, In(1)–N(1) 2.225, In(1)–N(2) 2.192; Cl(1)–In(1)–O(7) 178.47, O(2)–In(1)–N(1) 159.34, O(1)–In(1)–N(2) 159.19, C(27)–In(1)–C(12) 137.80.

## D. DFT calculations

### D-1-1. Computational details

Calculations were performed with Gaussian 16(C01) package (DFT),<sup>2</sup> using the Becke Three-Parameter functional with the non-local correlation by Perdew and Wang (B3PW91)<sup>3</sup> and the D3 version of Grimme's dispersion with Becke-Johnson damping (GD3BJ).<sup>4</sup> Whereas H, C, O, Cl, S and N atoms were represented with the 6-31G(d,p)++ basis set,<sup>5</sup> In and Al atoms were described by the Stuttgart/Dresden Effective Core Potential and the associated basis set,<sup>6</sup> as implemented in Gaussian 16(C01). Molecular geometries were optimized without any geometric constraints using the SMD continuum solvent model (DMSO).<sup>7</sup> To calculate free energy (G) corrections, frequency calculations were performed at the same level of theory. TD-DFT studies were carried out using the same level of theory that ground state optimizations as implemented in Gaussian 16(C01). UV-Vis data was plotted using Gausssum<sup>8</sup> and the Mulliken population of the orbitals was calculated using Chemission package.<sup>9</sup>

### D-1-2. Computed structures

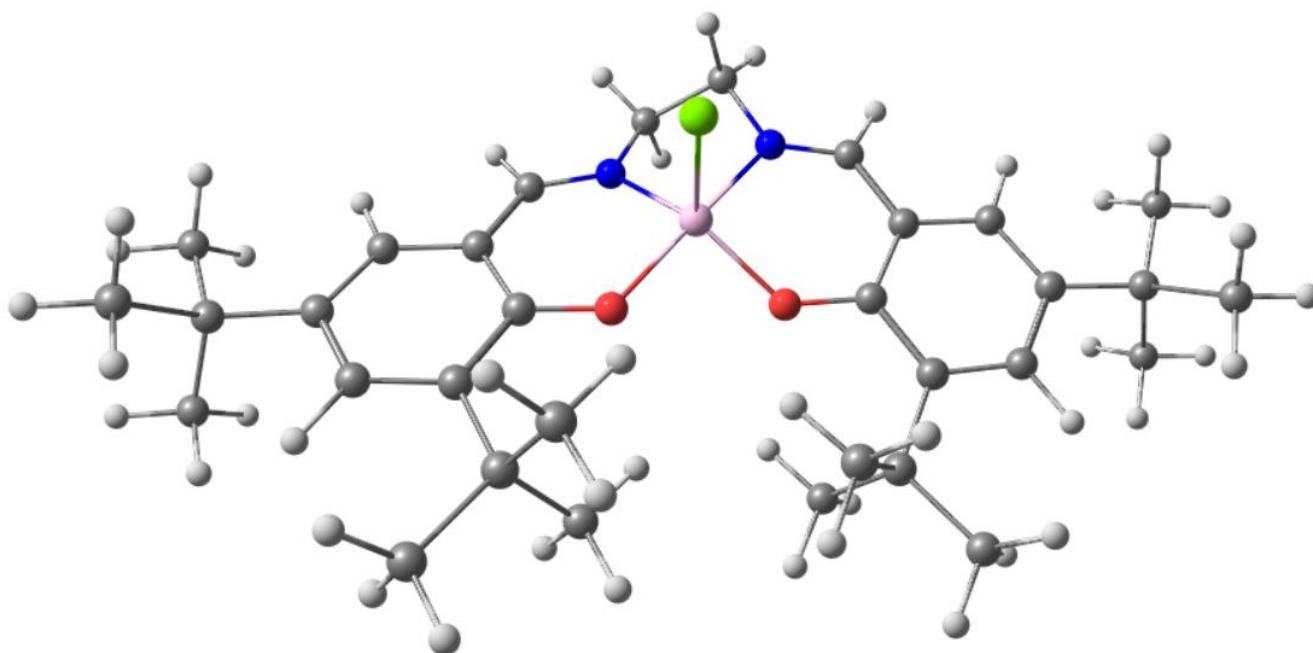

**Figure S30.** Optimised structure of **3a**

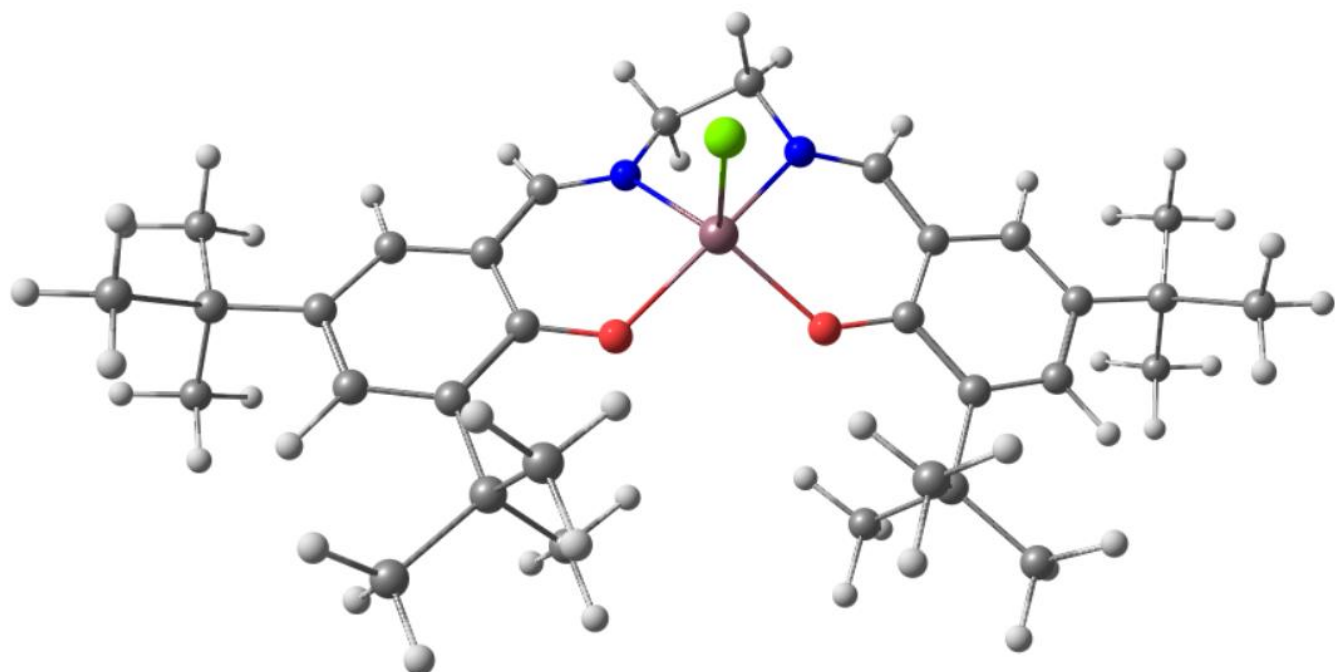

**Figure S31.** Optimised structure of **3b**

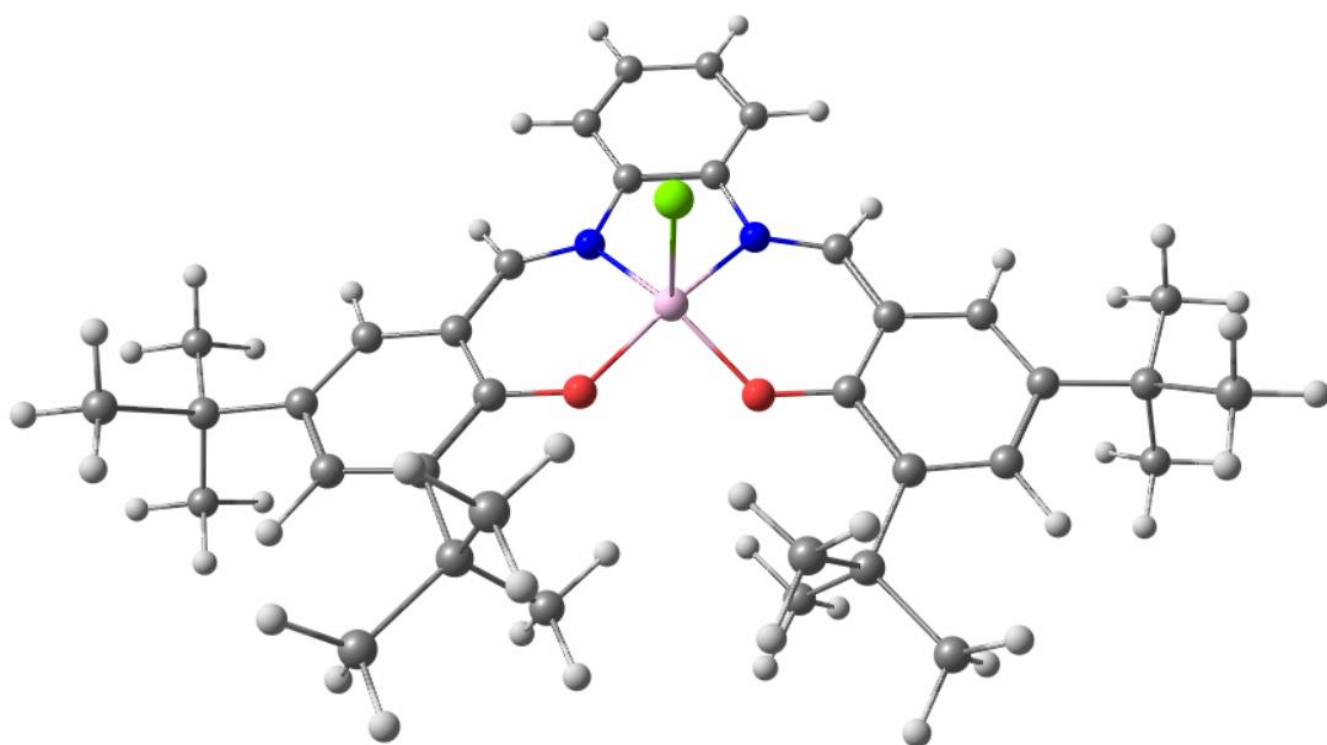

**Figure S32.** Optimised structure of **4a**



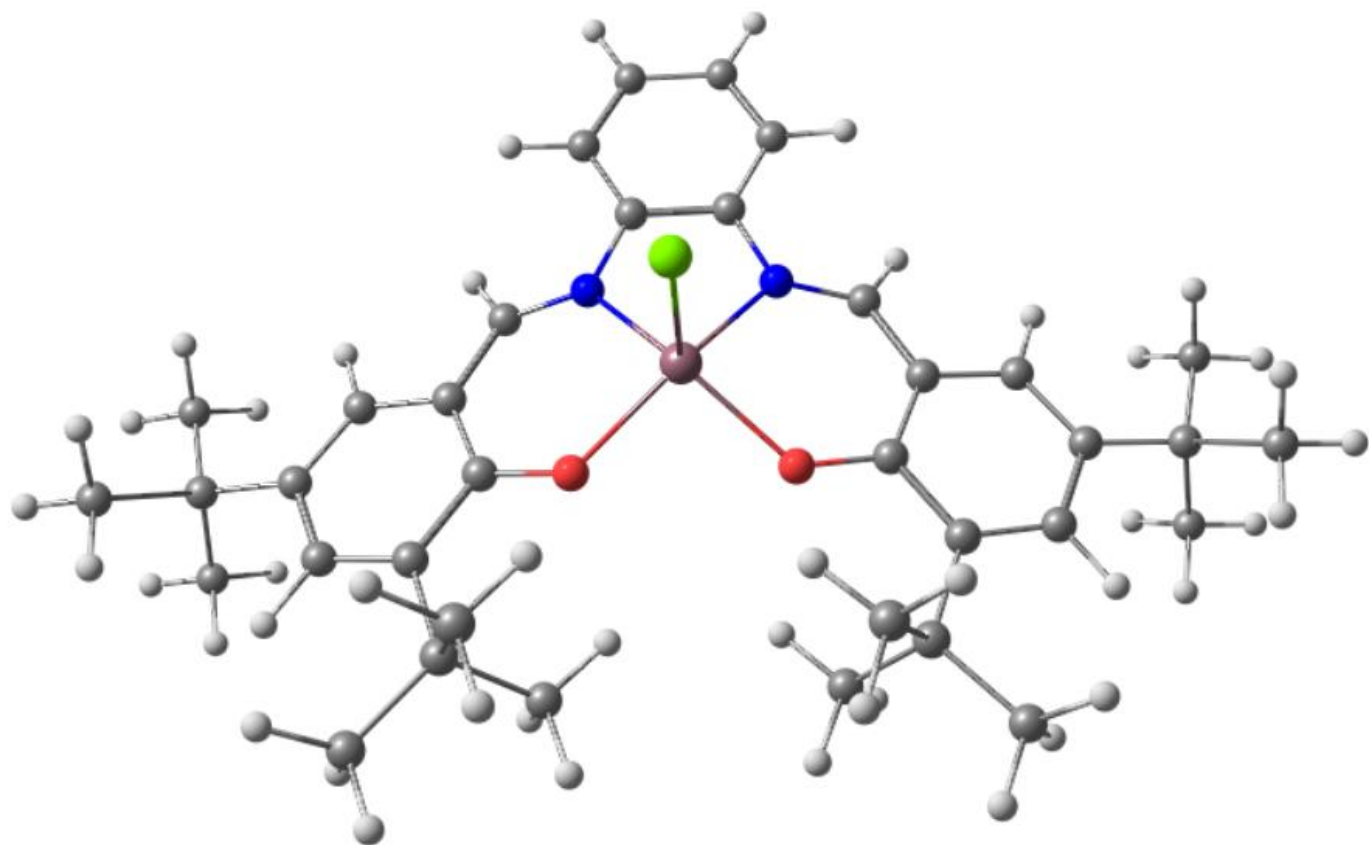

**Figure S33.** Optimised structure of **4b**

### D-1-3. Mulliken analysis

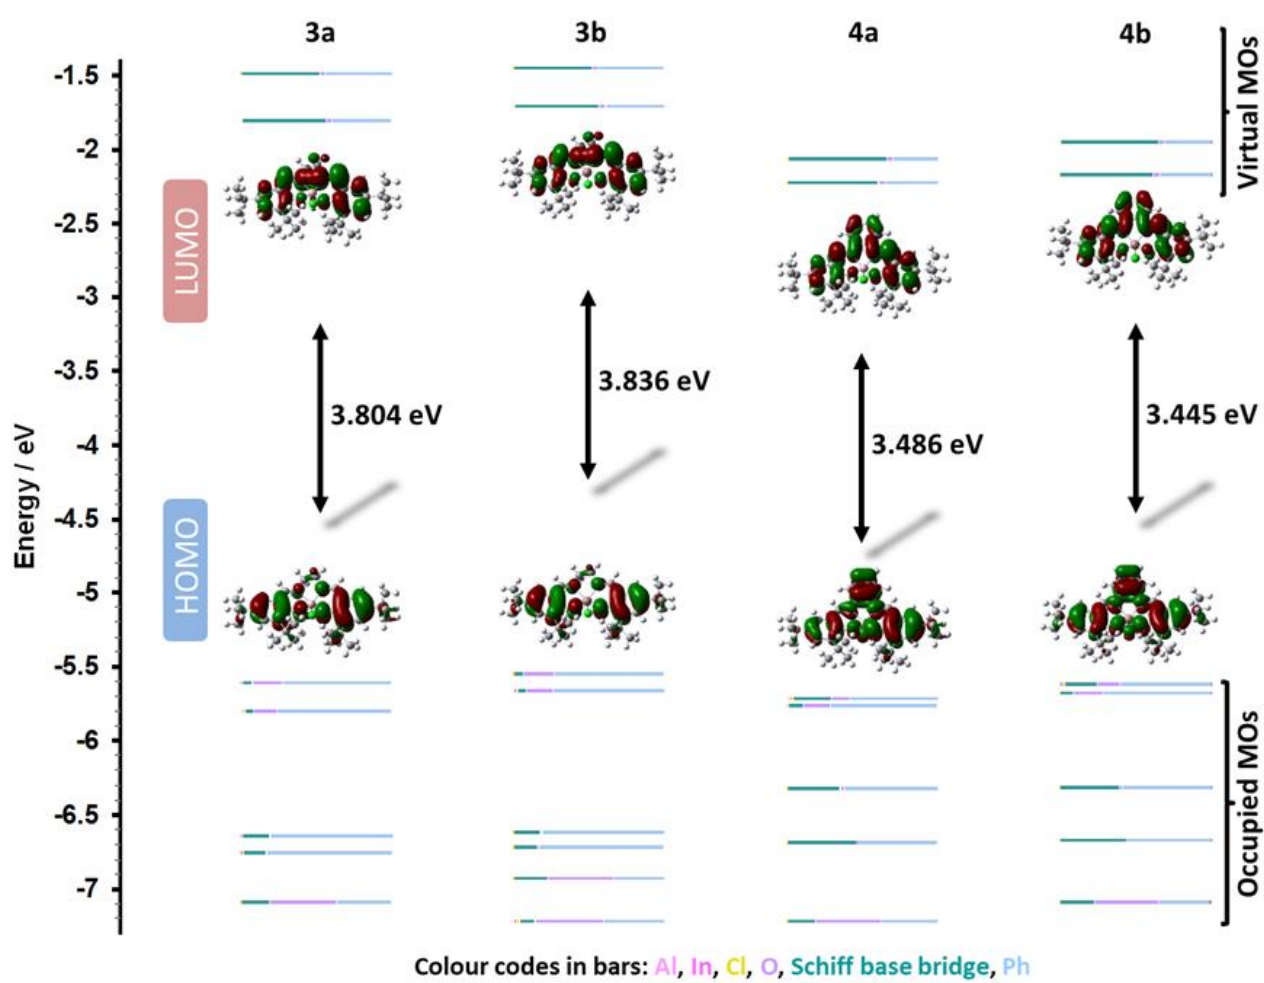

Figure S34. Mulliken orbital analysis of 3a-4b

## D-1-4. Atomic coordinates

3a

|    |              |              |              |
|----|--------------|--------------|--------------|
| 13 | -0.011604000 | -1.173378000 | 0.334471000  |
| 17 | 0.141518000  | -1.344298000 | 2.570362000  |
| 8  | 1.271648000  | 0.093971000  | 0.041504000  |
| 8  | -1.285868000 | 0.006722000  | -0.175384000 |
| 7  | 1.170302000  | -2.544420000 | -0.466405000 |
| 7  | -1.326447000 | -2.653973000 | 0.114075000  |
| 6  | 2.453700000  | -2.417811000 | -0.627852000 |
| 1  | 3.014640000  | -3.287457000 | -0.980357000 |
| 6  | 3.207615000  | -1.228635000 | -0.388798000 |
| 6  | 2.574212000  | 0.004555000  | -0.063507000 |
| 6  | 3.392846000  | 1.159756000  | 0.122317000  |
| 6  | 4.764599000  | 1.009250000  | -0.018709000 |
| 1  | 5.388398000  | 1.883075000  | 0.131564000  |
| 6  | 5.414085000  | -0.204487000 | -0.343950000 |
| 6  | 4.612508000  | -1.310345000 | -0.529884000 |
| 1  | 5.036088000  | -2.276537000 | -0.786386000 |
| 6  | 6.936409000  | -0.231612000 | -0.471447000 |
| 6  | 7.374264000  | 0.756096000  | -1.565643000 |
| 1  | 7.067251000  | 1.780872000  | -1.333527000 |
| 1  | 6.939510000  | 0.484482000  | -2.533866000 |
| 1  | 8.465436000  | 0.750701000  | -1.668601000 |
| 6  | 7.453296000  | -1.624346000 | -0.840151000 |
| 1  | 8.544948000  | -1.601621000 | -0.922997000 |
| 1  | 7.053973000  | -1.964191000 | -1.801971000 |
| 1  | 7.193559000  | -2.368429000 | -0.079355000 |
| 6  | 7.565534000  | 0.183073000  | 0.869000000  |
| 1  | 8.659090000  | 0.176024000  | 0.795031000  |
| 1  | 7.273668000  | -0.507837000 | 1.667536000  |
| 1  | 7.258280000  | 1.190835000  | 1.166317000  |
| 6  | 2.764703000  | 2.509181000  | 0.481370000  |
| 6  | 3.817742000  | 3.611890000  | 0.631622000  |
| 1  | 4.378519000  | 3.775114000  | -0.295363000 |
| 1  | 4.533244000  | 3.393824000  | 1.432127000  |
| 1  | 3.316546000  | 4.552192000  | 0.884655000  |
| 6  | 2.016087000  | 2.388956000  | 1.820655000  |
| 1  | 2.710153000  | 2.126816000  | 2.627422000  |
| 1  | 1.239482000  | 1.624629000  | 1.773703000  |
| 1  | 1.547874000  | 3.346564000  | 2.076592000  |
| 6  | 1.789726000  | 2.937241000  | -0.628917000 |
| 1  | 1.337078000  | 3.903380000  | -0.378063000 |
| 1  | 0.996457000  | 2.201006000  | -0.755167000 |
| 1  | 2.317015000  | 3.050814000  | -1.583210000 |
| 6  | -2.606669000 | -2.534315000 | -0.017579000 |
| 1  | -3.212111000 | -3.441629000 | -0.095974000 |
| 6  | -3.301536000 | -1.281396000 | -0.079383000 |
| 6  | -2.603021000 | -0.046607000 | -0.169193000 |
| 6  | -3.358836000 | 1.156367000  | -0.281506000 |
| 6  | -4.743947000 | 1.053365000  | -0.277435000 |
| 1  | -5.321359000 | 1.967960000  | -0.349565000 |
| 6  | -5.458518000 | -0.161254000 | -0.188971000 |
| 6  | -4.712695000 | -1.319490000 | -0.101128000 |
| 1  | -5.190399000 | -2.292429000 | -0.039435000 |
| 6  | -2.654824000 | 2.510995000  | -0.407410000 |
| 6  | -1.744923000 | 2.749363000  | 0.810881000  |
| 1  | -1.259716000 | 3.728499000  | 0.728035000  |
| 1  | -0.973015000 | 1.983534000  | 0.883195000  |
| 1  | -2.331096000 | 2.742466000  | 1.737059000  |
| 6  | -1.822447000 | 2.529122000  | -1.701724000 |
| 1  | -1.297501000 | 3.486357000  | -1.799617000 |
| 1  | -2.471545000 | 2.410085000  | -2.576873000 |
| 1  | -1.083954000 | 1.726026000  | -1.705617000 |
| 6  | -3.651821000 | 3.672623000  | -0.476569000 |
| 1  | -3.098053000 | 4.613362000  | -0.564080000 |
| 1  | -4.272475000 | 3.736804000  | 0.424069000  |
| 1  | -4.314241000 | 3.598590000  | -1.346038000 |

|   |              |              |              |
|---|--------------|--------------|--------------|
| 6 | -6.986441000 | -0.139028000 | -0.200108000 |
| 6 | -7.477570000 | 0.509691000  | -1.504964000 |
| 1 | -8.573040000 | 0.537602000  | -1.527192000 |
| 1 | -7.133749000 | -0.057811000 | -2.376721000 |
| 1 | -8.587007000 | 0.712328000  | 1.004149000  |
| 1 | -7.116314000 | 1.537850000  | -1.608323000 |
| 6 | -7.491363000 | 0.682356000  | 0.997875000  |
| 1 | -7.130092000 | 1.715154000  | 0.962592000  |
| 1 | -7.157306000 | 0.240304000  | 1.942957000  |
| 6 | -7.578203000 | -1.547601000 | -0.106395000 |
| 1 | -7.271113000 | -2.174253000 | -0.950806000 |
| 1 | -8.671592000 | -1.488550000 | -0.117216000 |
| 1 | -7.282003000 | -2.051954000 | 0.819774000  |
| 6 | -0.687226000 | -3.959737000 | 0.103421000  |
| 1 | -0.364899000 | -4.197970000 | 1.124173000  |
| 1 | -1.362612000 | -4.744471000 | -0.248219000 |
| 6 | 0.530887000  | -3.817144000 | -0.801721000 |
| 1 | 0.203413000  | -3.777341000 | -1.847403000 |
| 1 | 1.223351000  | -4.654986000 | -0.681116000 |

### 3b

|    |              |              |              |
|----|--------------|--------------|--------------|
| 49 | 0.010361000  | -0.867422000 | 0.513902000  |
| 17 | 0.214879000  | -0.847275000 | 2.895075000  |
| 8  | 1.479205000  | 0.416055000  | -0.078280000 |
| 8  | -1.508061000 | 0.359881000  | -0.037934000 |
| 7  | 1.242873000  | -2.416463000 | -0.396823000 |
| 7  | -1.386696000 | -2.495708000 | 0.168594000  |
| 6  | 2.511825000  | -2.296223000 | -0.625572000 |
| 1  | 3.050663000  | -3.174313000 | -0.996556000 |
| 6  | 3.306250000  | -1.109776000 | -0.451500000 |
| 6  | 2.766647000  | 0.188888000  | -0.188419000 |
| 6  | 3.676174000  | 1.287913000  | -0.079476000 |
| 6  | 5.031779000  | 1.037194000  | -0.230828000 |
| 1  | 5.718005000  | 1.871348000  | -0.139078000 |
| 6  | 5.586153000  | -0.234073000 | -0.498231000 |
| 6  | 4.702041000  | -1.285564000 | -0.610858000 |
| 1  | 5.056673000  | -2.289790000 | -0.822206000 |
| 6  | 7.099638000  | -0.379944000 | -0.649010000 |
| 6  | 7.583465000  | 0.504043000  | -1.810519000 |
| 1  | 7.352730000  | 1.560402000  | -1.639421000 |
| 1  | 7.111377000  | 0.203946000  | -2.752520000 |
| 1  | 8.669374000  | 0.415338000  | -1.930404000 |
| 6  | 7.508581000  | -1.826547000 | -0.937320000 |
| 1  | 8.597273000  | -1.887985000 | -1.037860000 |
| 1  | 7.067626000  | -2.195271000 | -1.869841000 |
| 1  | 7.211146000  | -2.501646000 | -0.127501000 |
| 6  | 7.785689000  | 0.070021000  | 0.651582000  |
| 1  | 8.874041000  | -0.022697000 | 0.560209000  |
| 1  | 7.461355000  | -0.546080000 | 1.497451000  |
| 1  | 7.559272000  | 1.114407000  | 0.888897000  |
| 6  | 3.153166000  | 2.699281000  | 0.214156000  |
| 6  | 4.290249000  | 3.723444000  | 0.303217000  |
| 1  | 4.852501000  | 3.798210000  | -0.634134000 |
| 1  | 4.994986000  | 3.488988000  | 1.108619000  |
| 1  | 3.866108000  | 4.711007000  | 0.513170000  |
| 6  | 2.411620000  | 2.711606000  | 1.562932000  |
| 1  | 3.082884000  | 2.413099000  | 2.376183000  |
| 1  | 1.558534000  | 2.031976000  | 1.553671000  |
| 1  | 2.047312000  | 3.722414000  | 1.780711000  |
| 6  | 2.204282000  | 3.155046000  | -0.908722000 |
| 1  | 1.838927000  | 4.167770000  | -0.701490000 |
| 1  | 1.346131000  | 2.487422000  | -0.995011000 |
| 1  | 2.727395000  | 3.176867000  | -1.871656000 |
| 6  | -2.649489000 | -2.377268000 | -0.077515000 |
| 1  | -3.225749000 | -3.292076000 | -0.250693000 |
| 6  | -3.392379000 | -1.145678000 | -0.150316000 |
| 6  | -2.802132000 | 0.156602000  | -0.125493000 |
| 6  | -3.666420000 | 1.291760000  | -0.231471000 |

|   |              |              |              |
|---|--------------|--------------|--------------|
| 6 | -5.030441000 | 1.071386000  | -0.353381000 |
| 1 | -5.682397000 | 1.934143000  | -0.428135000 |
| 6 | -5.634382000 | -0.204161000 | -0.389591000 |
| 6 | -4.792971000 | -1.292178000 | -0.292763000 |
| 1 | -5.187887000 | -2.303336000 | -0.317895000 |
| 6 | -3.086279000 | 2.711488000  | -0.204248000 |
| 6 | -2.338439000 | 2.950134000  | 1.119952000  |
| 1 | -1.940246000 | 3.971232000  | 1.145275000  |
| 1 | -1.508063000 | 2.253243000  | 1.239518000  |
| 1 | -3.016089000 | 2.832064000  | 1.973197000  |
| 6 | -2.126620000 | 2.908723000  | -1.391490000 |
| 1 | -1.709415000 | 3.922397000  | -1.371457000 |
| 1 | -2.657688000 | 2.782436000  | -2.341971000 |
| 1 | -1.303949000 | 2.193400000  | -1.356475000 |
| 6 | -4.180613000 | 3.779651000  | -0.312418000 |
| 1 | -3.715781000 | 4.770850000  | -0.285310000 |
| 1 | -4.893229000 | 3.726569000  | 0.518157000  |
| 1 | -4.740501000 | 3.704068000  | -1.251072000 |
| 6 | -7.151617000 | -0.316160000 | -0.531704000 |
| 6 | -7.592702000 | 0.362538000  | -1.839122000 |
| 1 | -8.680579000 | 0.295510000  | -1.955107000 |
| 1 | -7.127606000 | -0.119938000 | -2.705851000 |
| 1 | -8.917184000 | 0.322873000  | 0.569982000  |
| 1 | -7.321051000 | 1.422806000  | -1.857493000 |
| 6 | -7.826471000 | 0.386599000  | 0.658021000  |
| 1 | -7.557717000 | 1.446676000  | 0.707943000  |
| 1 | -7.533343000 | -0.080407000 | 1.604722000  |
| 6 | -7.616970000 | -1.774043000 | -0.561556000 |
| 1 | -7.184010000 | -2.321070000 | -1.406152000 |
| 1 | -8.706451000 | -1.810410000 | -0.665704000 |
| 1 | -7.353656000 | -2.303590000 | 0.360511000  |
| 6 | -0.709648000 | -3.782334000 | 0.150301000  |
| 1 | -0.409930000 | -4.026401000 | 1.177052000  |
| 1 | -1.359081000 | -4.579396000 | -0.225384000 |
| 6 | 0.538532000  | -3.652555000 | -0.729035000 |
| 1 | 0.226670000  | -3.594160000 | -1.778981000 |
| 1 | 1.186465000  | -4.526737000 | -0.607712000 |

#### 4a

|    |              |              |              |
|----|--------------|--------------|--------------|
| 13 | 0.023742000  | 0.771972000  | 0.412360000  |
| 17 | 0.159154000  | 0.929091000  | 2.636528000  |
| 8  | -1.278500000 | -0.476633000 | 0.155139000  |
| 8  | 1.249106000  | -0.443705000 | -0.157479000 |
| 7  | -1.255902000 | 2.214726000  | -0.099075000 |
| 7  | 1.314023000  | 2.241712000  | -0.052318000 |
| 6  | 0.726129000  | 3.518160000  | -0.096010000 |
| 6  | -0.683956000 | 3.502408000  | -0.126091000 |
| 6  | -1.391778000 | 4.708468000  | -0.144864000 |
| 1  | -2.476066000 | 4.717160000  | -0.129050000 |
| 6  | -0.702521000 | 5.914803000  | -0.155818000 |
| 1  | -1.258206000 | 6.847329000  | -0.165923000 |
| 6  | 0.694609000  | 5.930087000  | -0.131507000 |
| 1  | 1.229818000  | 6.874547000  | -0.125516000 |
| 6  | 1.408523000  | 4.738882000  | -0.094544000 |
| 1  | 2.491449000  | 4.770511000  | -0.049374000 |
| 6  | -2.533448000 | 2.040264000  | -0.336790000 |
| 1  | -3.131562000 | 2.908753000  | -0.611292000 |
| 6  | -3.236283000 | 0.811541000  | -0.260206000 |
| 6  | -2.578911000 | -0.420544000 | 0.022426000  |
| 6  | -3.371404000 | -1.602776000 | 0.137201000  |
| 6  | -4.737885000 | -1.484208000 | -0.064424000 |
| 1  | -5.341539000 | -2.380177000 | 0.024141000  |
| 6  | -5.409145000 | -0.277442000 | -0.377555000 |
| 6  | -4.638025000 | 0.858216000  | -0.469250000 |
| 1  | -5.081215000 | 1.823415000  | -0.693458000 |
| 6  | -6.922266000 | -0.292238000 | -0.585127000 |
| 6  | -7.265762000 | -1.238913000 | -1.747152000 |
| 1  | -6.933728000 | -2.262891000 | -1.548472000 |
| 1  | -6.791799000 | -0.904582000 | -2.676522000 |

|   |              |              |              |
|---|--------------|--------------|--------------|
| 1 | -8.349587000 | -1.265254000 | -1.907644000 |
| 6 | -7.465675000 | 1.099920000  | -0.915494000 |
| 1 | -8.549669000 | 1.046315000  | -1.060387000 |
| 1 | -7.026552000 | 1.499198000  | -1.836224000 |
| 1 | -7.273512000 | 1.813291000  | -0.106751000 |
| 6 | -7.606417000 | -0.791813000 | 0.698058000  |
| 1 | -8.694002000 | -0.813785000 | 0.564609000  |
| 1 | -7.379978000 | -0.132749000 | 1.543327000  |
| 1 | -7.283028000 | -1.803461000 | 0.963019000  |
| 6 | -2.726609000 | -2.946969000 | 0.482018000  |
| 6 | -3.760138000 | -4.073715000 | 0.579002000  |
| 1 | -4.287081000 | -4.232628000 | -0.368270000 |
| 1 | -4.505175000 | -3.885410000 | 1.359894000  |
| 1 | -3.246187000 | -5.007245000 | 0.831181000  |
| 6 | -2.017717000 | -2.842878000 | 1.844065000  |
| 1 | -2.738773000 | -2.609704000 | 2.635823000  |
| 1 | -1.251596000 | -2.066463000 | 1.837029000  |
| 1 | -1.541428000 | -3.798117000 | 2.092864000  |
| 6 | -1.716793000 | -3.325606000 | -0.613294000 |
| 1 | -1.247102000 | -4.286413000 | -0.374794000 |
| 1 | -0.938871000 | -2.568474000 | -0.702557000 |
| 1 | -2.218633000 | -3.427558000 | -1.582418000 |
| 6 | 2.603701000  | 2.072960000  | -0.184839000 |
| 1 | 3.237364000  | 2.947453000  | -0.330736000 |
| 6 | 3.273264000  | 0.819494000  | -0.174812000 |
| 6 | 2.562440000  | -0.414259000 | -0.187179000 |
| 6 | 3.308712000  | -1.627195000 | -0.266741000 |
| 6 | 4.692803000  | -1.533289000 | -0.288803000 |
| 1 | 5.262213000  | -2.454635000 | -0.331290000 |
| 6 | 5.421024000  | -0.320754000 | -0.264572000 |
| 6 | 4.688773000  | 0.844491000  | -0.223103000 |
| 1 | 5.175000000  | 1.814911000  | -0.218736000 |
| 6 | 2.597732000  | -2.980366000 | -0.342011000 |
| 6 | 1.686670000  | -3.170834000 | 0.882982000  |
| 1 | 1.197271000  | -4.149926000 | 0.834501000  |
| 1 | 0.919058000  | -2.399324000 | 0.930062000  |
| 1 | 2.273946000  | -3.134597000 | 1.807741000  |
| 6 | 1.773950000  | -3.031573000 | -1.640713000 |
| 1 | 1.232146000  | -3.981598000 | -1.709554000 |
| 1 | 2.433053000  | -2.955485000 | -2.513054000 |
| 1 | 1.050453000  | -2.215904000 | -1.682511000 |
| 6 | 3.586606000  | -4.150599000 | -0.369974000 |
| 1 | 3.025187000  | -5.089396000 | -0.421676000 |
| 1 | 4.208191000  | -4.185879000 | 0.531626000  |
| 1 | 4.247510000  | -4.114509000 | -1.242844000 |
| 6 | 6.947751000  | -0.359133000 | -0.297969000 |
| 6 | 7.411057000  | -1.060051000 | -1.585864000 |
| 1 | 8.505655000  | -1.100231000 | -1.623444000 |
| 1 | 7.059435000  | -0.520645000 | -2.472182000 |
| 1 | 8.558247000  | -1.180198000 | 0.912236000  |
| 1 | 7.038044000  | -2.087408000 | -1.646208000 |
| 6 | 7.463003000  | -1.141261000 | 0.921592000  |
| 1 | 7.093543000  | -2.171667000 | 0.929280000  |
| 1 | 7.147118000  | -0.662201000 | 1.854769000  |
| 6 | 7.553522000  | 1.046109000  | -0.264949000 |
| 1 | 7.242076000  | 1.643309000  | -1.128831000 |
| 1 | 8.646014000  | 0.975758000  | -0.286730000 |
| 1 | 7.273325000  | 1.587701000  | 0.645042000  |

#### 4b

|    |              |              |              |
|----|--------------|--------------|--------------|
| 49 | 0.010709000  | 0.559157000  | 0.747461000  |
| 17 | 0.068229000  | 0.711253000  | 3.121998000  |
| 8  | -1.488270000 | -0.735745000 | 0.308812000  |
| 8  | 1.453370000  | -0.739391000 | 0.160715000  |
| 7  | -1.320330000 | 2.137168000  | 0.031969000  |
| 7  | 1.343161000  | 2.139318000  | 0.018974000  |
| 6  | 0.721015000  | 3.401660000  | -0.015832000 |

|   |              |              |              |
|---|--------------|--------------|--------------|
| 6 | -0.697996000 | 3.399473000  | -0.009995000 |
| 6 | -1.389062000 | 4.615256000  | 0.005250000  |
| 1 | -2.472876000 | 4.622913000  | 0.059140000  |
| 6 | -0.691907000 | 5.817701000  | -0.013341000 |
| 1 | -1.239994000 | 6.754664000  | 0.003769000  |
| 6 | 0.704598000  | 5.820208000  | -0.020149000 |
| 1 | 1.249343000  | 6.759208000  | -0.008991000 |
| 6 | 1.406766000  | 4.620598000  | -0.007856000 |
| 1 | 2.490977000  | 4.634421000  | 0.033219000  |
| 6 | -2.557333000 | 1.950873000  | -0.344791000 |
| 1 | -3.108324000 | 2.810850000  | -0.730245000 |
| 6 | -3.292573000 | 0.726297000  | -0.328060000 |
| 6 | -2.746894000 | -0.556064000 | 0.003544000  |
| 6 | -3.615968000 | -1.692712000 | -0.030224000 |
| 6 | -4.939006000 | -1.495332000 | -0.390651000 |
| 1 | -5.595475000 | -2.357533000 | -0.411797000 |
| 6 | -5.499094000 | -0.243599000 | -0.737262000 |
| 6 | -4.657425000 | 0.843912000  | -0.702804000 |
| 1 | -5.019427000 | 1.835429000  | -0.956009000 |
| 6 | -6.974660000 | -0.161358000 | -1.123486000 |
| 6 | -7.227941000 | -1.050692000 | -2.352036000 |
| 1 | -6.979123000 | -2.097914000 | -2.152670000 |
| 1 | -6.627745000 | -0.717604000 | -3.205851000 |
| 1 | -8.284370000 | -1.008446000 | -2.640886000 |
| 6 | -7.396742000 | 1.269881000  | -1.463936000 |
| 1 | -8.457537000 | 1.285754000  | -1.734926000 |
| 1 | -6.830919000 | 1.669138000  | -2.312746000 |
| 1 | -7.260987000 | 1.946393000  | -0.613151000 |
| 6 | -7.835235000 | -0.658204000 | 0.050035000  |
| 1 | -8.898567000 | -0.611220000 | -0.211434000 |
| 1 | -7.675690000 | -0.040148000 | 0.940387000  |
| 1 | -7.602785000 | -1.695101000 | 0.313150000  |
| 6 | -3.084744000 | -3.085051000 | 0.330487000  |
| 6 | -4.179262000 | -4.154391000 | 0.242164000  |
| 1 | -4.590414000 | -4.241165000 | -0.769594000 |
| 1 | -5.005967000 | -3.957438000 | 0.933602000  |
| 1 | -3.750663000 | -5.126241000 | 0.508470000  |
| 6 | -2.552071000 | -3.084480000 | 1.774687000  |
| 1 | -3.347815000 | -2.819984000 | 2.480260000  |
| 1 | -1.732135000 | -2.375373000 | 1.897230000  |
| 1 | -2.186994000 | -4.083995000 | 2.038070000  |
| 6 | -1.960818000 | -3.486404000 | -0.641240000 |
| 1 | -1.584883000 | -4.484059000 | -0.386342000 |
| 1 | -1.131488000 | -2.780695000 | -0.594300000 |
| 1 | -2.333010000 | -3.519643000 | -1.671568000 |
| 6 | 2.586671000  | 1.952753000  | -0.332568000 |
| 1 | 3.156407000  | 2.815017000  | -0.684045000 |
| 6 | 3.307132000  | 0.718339000  | -0.329761000 |
| 6 | 2.727629000  | -0.568546000 | -0.086214000 |
| 6 | 3.575917000  | -1.718488000 | -0.155546000 |
| 6 | 4.918140000  | -1.526631000 | -0.441643000 |
| 1 | 5.559899000  | -2.399142000 | -0.482736000 |
| 6 | 5.514122000  | -0.268711000 | -0.690837000 |
| 6 | 4.688084000  | 0.830555000  | -0.639722000 |
| 1 | 5.076149000  | 1.826754000  | -0.827914000 |
| 6 | 2.999528000  | -3.121541000 | 0.068300000  |
| 6 | 2.353474000  | -3.221322000 | 1.461780000  |
| 1 | 1.974199000  | -4.237012000 | 1.623263000  |
| 1 | 1.523106000  | -2.522695000 | 1.568876000  |
| 1 | 3.089221000  | -3.008530000 | 2.245698000  |
| 6 | 1.953610000  | -3.423378000 | -1.019831000 |
| 1 | 1.516144000  | -4.415155000 | -0.856801000 |
| 1 | 2.418459000  | -3.418884000 | -2.012336000 |
| 1 | 1.151113000  | -2.684976000 | -1.010214000 |
| 6 | 4.082033000  | -4.203609000 | -0.014529000 |
| 1 | 3.620626000  | -5.183079000 | 0.149379000  |
| 1 | 4.856659000  | -4.070671000 | 0.748874000  |
| 1 | 4.567540000  | -4.228656000 | -0.996154000 |
| 6 | 7.007052000  | -0.192913000 | -1.005327000 |

|   |             |              |              |
|---|-------------|--------------|--------------|
| 6 | 7.301087000 | -1.013491000 | -2.272158000 |
| 1 | 8.370426000 | -0.976498000 | -2.509646000 |
| 1 | 6.747503000 | -0.617979000 | -3.130833000 |
| 1 | 8.879374000 | -0.732960000 | -0.036826000 |
| 1 | 7.023911000 | -2.065170000 | -2.147611000 |
| 6 | 7.804581000 | -0.774446000 | 0.173699000  |
| 1 | 7.542915000 | -1.820306000 | 0.363637000  |
| 1 | 7.614903000 | -0.206995000 | 1.091408000  |
| 6 | 7.468554000 | 1.247244000  | -1.240982000 |
| 1 | 6.951456000 | 1.705810000  | -2.090875000 |
| 1 | 8.541378000 | 1.258377000  | -1.459914000 |
| 1 | 7.302651000 | 1.875903000  | -0.359377000 |



## E- Cost calculation

**Table S2.** Average Price of Electricity to household and non-household medium size consumer, by European Country, 2020 and 2021 (euro per Kilowatthour) reproduced from (<https://ec.europa.eu/eurostat/databrowser/bookmark/16fed460-2ba9-4e42-8f41-1258ca339ca2?lang=en>) accessed in May 2022. Note that United Kingdom 2021 values have been reproduced from ([https://www.ukpower.co.uk/home\\_energy/tariffs-per-unit-kwh](https://www.ukpower.co.uk/home_energy/tariffs-per-unit-kwh)) and (<https://www.gov.uk/government/statistical-data-sets/gas-and-electricity-prices-in-the-non-domestic-sector>) to household and non-household respectively. Data use for calculation in Table S3 and S4 are highlighted in yellow.

| Energy indicator                                                                                       | Medium size household |               | Non-household, medium size consumers |        |          |
|--------------------------------------------------------------------------------------------------------|-----------------------|---------------|--------------------------------------|--------|----------|
|                                                                                                        | TIME                  | 2020          | 2021                                 | 2020   | 2021     |
| <b>GEO (Labels)</b>                                                                                    |                       |               |                                      |        |          |
| European Union - 27 countries (from 2020)                                                              |                       | 0,2134        | 0,2203                               | 0,0818 | 0,0859   |
| European Union - 28 countries (2013-2020)                                                              |                       | :             | :                                    | :      | :        |
| Euro area (EA11-1999, EA12-2001, EA13-2007, EA15-2008, EA16-2009, Euro area - 19 countries (from 2015) |                       | 0,2263        | 0,2322                               | 0,0835 | 0,0888   |
| Belgium                                                                                                |                       | 0,2792        | 0,2702                               | 0,0795 | 0,0810   |
| Bulgaria                                                                                               |                       | 0,0997        | 0,1024                               | 0,0805 | 0,0842   |
| Czechia                                                                                                |                       | 0,1841        | 0,1802                               | 0,0716 | 0,0739   |
| Denmark                                                                                                |                       | 0,2833        | 0,2900                               | 0,0540 | 0,0725   |
| Germany (until 1990 former territory of the FRG)                                                       |                       | 0,3043        | 0,3193                               | 0,0849 | 0,0908   |
| Estonia                                                                                                |                       | 0,1236        | 0,1324                               | 0,0675 | 0,0834   |
| Ireland                                                                                                |                       | 0,2413        | 0,2555                               | 0,1265 | 0,1378   |
| Greece                                                                                                 |                       | 0,1674        | 0,1680                               | 0,0823 | 0,0890   |
| Spain                                                                                                  |                       | 0,2239        | 0,2323                               | 0,0786 | 0,0931   |
| France                                                                                                 |                       | 0,1893        | 0,1946                               | 0,0847 | 0,0850   |
| Croatia                                                                                                |                       | 0,1301        | 0,1291                               | 0,0898 | 0,0881   |
| Italy                                                                                                  |                       | 0,2226        | 0,2259                               | 0,0856 | 0,0939   |
| Cyprus                                                                                                 |                       | 0,2133        | 0,1976                               | 0,1178 | 0,1091   |
| Latvia                                                                                                 |                       | 0,1420        | 0,1403                               | 0,0813 | 0,0849   |
| Lithuania                                                                                              |                       | 0,1426        | 0,1348                               | 0,0871 | 0,0932   |
| Luxembourg                                                                                             |                       | 0,1986        | 0,1988                               | 0,0824 | 0,0836   |
| Hungary                                                                                                |                       | 0,1031        | 0,1003                               | 0,0849 | 0,0818   |
| Malta                                                                                                  |                       | 0,1284        | 0,1285                               | 0,1328 | 0,1330   |
| Netherlands                                                                                            |                       | 0,1427        | 0,1281                               | 0,0680 | 0,0721   |
| Austria                                                                                                |                       | 0,2111        | 0,2216                               | 0,0877 | 0,0884   |
| Poland                                                                                                 |                       | 0,1475        | 0,1548                               | 0,0800 | 0,0731   |
| Portugal                                                                                               |                       | 0,2120        | 0,2089                               | 0,0794 | 0,0755   |
| Romania                                                                                                |                       | 0,1459        | 0,1536                               | 0,0890 | 0,0824   |
| Slovenia                                                                                               |                       | 0,1448        | 0,1662                               | 0,0811 | 0,0757   |
| Slovakia                                                                                               |                       | 0,1686        | 0,1668                               | 0,0977 | 0,0929   |
| Finland                                                                                                |                       | 0,1740        | 0,1767                               | 0,0625 | 0,0669   |
| Sweden                                                                                                 |                       | 0,1826        | e 0,2114                             | 0,0641 | 0,0705   |
| Iceland                                                                                                |                       | 0,1341        | 0,1355                               | 0,0713 | 0,0449   |
| Liechtenstein                                                                                          |                       | 0,2115        | 0,2071                               | 0,0880 | 0,0863   |
| Norway                                                                                                 |                       | 0,1355        | 0,1826                               | 0,0417 | 0,0715   |
| Switzerland                                                                                            |                       | :             | :                                    | :      | :        |
| United Kingdom                                                                                         |                       | 0,2203        | 0,2407*                              | 0,1065 | 0,1546** |
| Montenegro                                                                                             |                       | 0,0988        | 0,0980                               | 0,0766 | 0,0773   |
| North Macedonia                                                                                        |                       | 0,0782        | 0,0841                               | 0,0778 | 0,0752   |
| Albania                                                                                                |                       | 0,0922        | e :                                  | 0,1037 | :        |
| Serbia                                                                                                 |                       | 0,0738        | 0,0791                               | 0,0748 | 0,0702   |
| Turkey                                                                                                 |                       | 0,0995        | 0,0834                               | 0,0774 | 0,0648   |
| Bosnia and Herzegovina                                                                                 |                       | 0,0870        | 0,0875                               | 0,0708 | 0,0719   |
| Kosovo (under United Nations Security Council Resolution 1244/99)                                      |                       | 0,0605        | 0,0605                               | 0,0638 | 0,0635   |
| Moldova                                                                                                |                       | 0,1068        | 0,0851                               | 0,0795 | 0,0633   |
| Ukraine                                                                                                |                       | 0,0466        | 0,0485                               | 0,0595 | 0,0595   |
| Georgia                                                                                                |                       | 0,0663        | 0,0631                               | 0,0505 | 0,0713   |
| <b>Special value</b>                                                                                   |                       |               |                                      |        |          |
| :                                                                                                      |                       | not available |                                      |        |          |
| <b>Available flags:</b>                                                                                |                       |               |                                      |        |          |
| e                                                                                                      |                       | estimated     |                                      |        |          |
| p                                                                                                      |                       | provisional   |                                      |        |          |

**Table S3.** Average costs calculation to medium size household consumers in euro for the mechanochemical synthesis of 1 kg of the ligands **1** and **2** and complexes **3a**, **3b**, **4a** and **4b**

| <i>Year</i>    | 2020     | 2021  | 2020     | 2021  | 2020      | 2021   | 2020      | 2021   | 2020      | 2021   | 2020      | 2021   |
|----------------|----------|-------|----------|-------|-----------|--------|-----------|--------|-----------|--------|-----------|--------|
|                | <b>1</b> |       | <b>2</b> |       | <b>3a</b> |        | <b>3b</b> |        | <b>4a</b> |        | <b>4b</b> |        |
| <b>Spain</b>   | 671.7    | 696.9 | 671.7    | 696.9 | 2686.8    | 2787.6 | 2686.8    | 2787.6 | 2686.8    | 2787.6 | 2686.8    | 2787.6 |
| <b>Germany</b> | 912.9    | 957.9 | 912.9    | 957.9 | 3651.6    | 3831.6 | 3651.6    | 3831.6 | 3651.6    | 3831.6 | 3651.6    | 3831.6 |
| <b>France</b>  | 567.9    | 583.6 | 567.9    | 583.6 | 2271.6    | 2335.2 | 2271.6    | 2335.2 | 2271.6    | 2335.2 | 2271.6    | 2335.2 |
| <b>UK</b>      | 660.9    | 722.1 | 660.9    | 722.1 | 2643.6    | 2888.4 | 2643.6    | 2888.4 | 2643.6    | 2888.4 | 2643.6    | 2888.4 |

**Table S4.** Average costs calculation to non-household, medium size consumers in euro for the mechanochemical synthesis of 1 kg of the ligands **1** and **2** and complexes **3a**, **3b**, **4a** and **4b**

| <i>Year</i>    | 2020     | 2021  | 2020     | 2021  | 2020      | 2021   | 2020      | 2021   | 2020      | 2021   | 2020      | 2021   |
|----------------|----------|-------|----------|-------|-----------|--------|-----------|--------|-----------|--------|-----------|--------|
|                | <b>1</b> |       | <b>2</b> |       | <b>3a</b> |        | <b>3b</b> |        | <b>4a</b> |        | <b>4b</b> |        |
| <b>Spain</b>   | 235.8    | 279.3 | 235.8    | 279.3 | 943.2     | 1117.2 | 943.2     | 1117.2 | 943.2     | 1117.2 | 943.2     | 1117.2 |
| <b>Germany</b> | 254.7    | 272.4 | 254.7    | 272.4 | 1018.8    | 1089.6 | 1018.8    | 1089.6 | 1018.8    | 1089.6 | 1018.8    | 1089.6 |
| <b>France</b>  | 254.1    | 255   | 254.1    | 255   | 1016.4    | 1020   | 1016.4    | 1020   | 1016.4    | 1020   | 1016.4    | 1020   |
| <b>UK</b>      | 319.5    | 463.8 | 319.5    | 463.8 | 1278      | 1855.2 | 1278      | 1855.2 | 1278      | 1855.2 | 1278      | 1855.2 |

## F. REFERENCES

1. F. Garcia, H. C. Ong and V. K. Singh, *Inorg. Chem. Commun.*, 2020.
2. M. Frisch, G. Trucks, H. Schlegel, G. Scuseria, M. Robb, J. Cheeseman, G. Scalmani, V. Barone, G. Petersson and H. J. G. I. W. C. Nakatsuji, *Comp. Chem.*, 2016, **1**.
3. A. D. J. J. C. P. Becke, *Proc. Nat. Ac. Sc.*, 1993, **98**, 5648-5652.
4. S. Grimme, S. Ehrlich and L. J. J. o. c. c. Goerigk, *J. Comput. Chem*, 2011, **32**, 1456-1465.
5. a. Petersson, A. Bennett, T. G. Tensfeldt, M. A. Al-Laham, W. A. Shirley and J. J. T. J. o. c. p. Mantzaris, *J. Chem. Phys.*, 1988, **89**, 2193-2218.
6. T. Dunning and P. Hay, *J. Chem. Phys.*, 1977.
7. A. V. Marenich, C. J. Cramer and D. G. J. T. J. o. P. C. B. Truhlar, *J. Chem. Phys.*, 2009, **113**, 6378-6396.
8. A. R. J. J. o. c. c. Allouche, *J. Comput. Chem*, 2011, **32**, 174-182.
9. S. Leonid, *Chemissian*, n.d.
